# Supplementary material for: COVID-19 mortality risk assessment: An international multi-center study
Source: PubMed Central journal article supplement (PMC7725386; doi:10.1371/journal.pone.0243262), 2020-12-09
Supplement: pone.0243262.s002.pdf [file pone.0243262.s002.pdf]

# From predictions to prescriptions: A data-driven response to COVID-19

Dimitris Bertsimas<sup>a,b,1</sup>, Leonard Boussiou<sup>b</sup>, Ryan Cory-Wright<sup>b</sup>, Arthur Delarue<sup>b</sup>, Vassilis Digalakis<sup>b</sup>, Alexandre Jacquillat<sup>a,b</sup>, Driss Lahlou Kitane<sup>b</sup>, Galit Lukin<sup>b</sup>, Michael Li<sup>b</sup>, Luca Mingardi<sup>b</sup>, Omid Nohadani<sup>c</sup>, Agni Orfanoudaki<sup>b</sup>, Theodore Papalexopoulos<sup>b</sup>, Ivan Paskov<sup>b</sup>, Jean Pauphilet<sup>b</sup>, Omar Skali Lami<sup>b</sup>, Bartolomeo Stellato<sup>b</sup>, Hamza Tazi Bouardi<sup>b</sup>, Kimberly Villalobos Carballo<sup>b</sup>, Holly Wiberg<sup>b</sup>, and Cynthia Zeng<sup>b</sup>

<sup>a</sup>Sloan School of Management, Massachusetts Institute of Technology, Cambridge, MA 02142; <sup>b</sup>Operations Research Center, Massachusetts Institute of Technology, Cambridge, MA 02139; <sup>c</sup>Benefits Science Technologies, Boston, MA 02110

This manuscript was compiled on June 2, 2020

1 **The COVID-19 pandemic has created unprecedented challenges**  
2 **worldwide. Strained healthcare providers make difficult decisions**  
3 **on patient triage, treatment and care management on a daily basis.**  
4 **Policy makers have imposed social distancing measures to slow the**  
5 **disease, at a steep economic price. We design analytical tools to sup-**  
6 **port these decisions and combat the pandemic. Specifically, we pro-**  
7 **pose a comprehensive data-driven approach to understand the clini-**  
8 **cal characteristics of COVID-19, predict its mortality, forecast its evo-**  
9 **lution, and ultimately alleviate its impact. By leveraging cohort-level**  
10 **clinical data, patient-level hospital data, and census-level epidemio-**  
11 **logical data, we develop an integrated four-step approach, combin-**  
12 **ing descriptive, predictive and prescriptive analytics. First, we ag-**  
13 **gregate hundreds of clinical studies into the most comprehensive**  
14 **database on COVID-19 to paint a new macroscopic picture of the dis-**  
15 **ease. Second, we build personalized calculators to predict the risk**  
16 **of infection and mortality as a function of demographics, symptoms,**  
17 **comorbidities, and lab values. Third, we develop a novel epidemio-**  
18 **logical model to project the pandemic's spread and inform social**  
19 **distancing policies. Fourth, we propose an optimization model to re-**  
20 **allocate ventilators and alleviate shortages. Our results have been**  
21 **used at the clinical level by several hospitals to triage patients, guide**  
22 **care management, plan ICU capacity, and re-distribute ventilators. At**  
23 **the policy level, they are currently supporting safe back-to-work poli-**  
24 **cies at a major institution and equitable vaccine distribution planning**  
25 **at a major pharmaceutical company, and have been integrated into**  
26 **the US Center for Disease Control's pandemic forecast.**

COVID-19 | Epidemiological modeling | Machine learning | Optimization

1 **I**n just a few weeks, the whole world has been upended by the  
2 outbreak of COVID-19, an acute respiratory disease caused  
3 by a new coronavirus called SARS-CoV-2. The virus is highly  
4 contagious: it is easily transmitted from person to person via  
5 respiratory droplet nuclei and can persist on surfaces for days  
6 (1, 2). As a result, COVID-19 has spread rapidly—classified by  
7 the World Health Organization as a public health emergency  
8 on January 30, 2020 and as a pandemic on March 11. As of  
9 mid-May, over 4.5 million cases and 300,000 deaths have been  
10 reported globally (3).

11 Because no treatment is currently available, healthcare  
12 providers and policy makers are wrestling with unprecedented  
13 challenges. Hospitals and other care facilities are facing short-  
14 ages of beds, ventilators and personal protective equipment—  
15 raising hard questions on how to treat COVID-19 patients  
16 with scarce supplies and how to allocate resources to prevent  
17 further shortages. At the policy level, most countries have  
18 imposed “social distancing” measures to slow the spread of the  
19 pandemic. These measures allow strained healthcare systems

20 to cope with the disease by “flattening the curve” (4) but  
21 also come at a steep economic price (5, 6). Nearly all gov-  
22 ernments are now confronted to difficult decisions balancing  
23 public health and socio-economic outcomes.

24 This paper proposes a comprehensive data-driven approach  
25 to understand the clinical characteristics of COVID-19, predict  
26 its mortality, forecast its evolution, and ultimately alleviate  
27 its impact. We leverage a broad range of data sources, which  
28 include (i) our own cohort-level data aggregating hundreds of  
29 clinical studies, (ii) patient-level data obtained from electronic  
30 health records, and (iii) census reports on the scale of the pan-  
31 demic. We develop an integrated approach spanning descrip-  
32 tive analytics (to derive a macroscopic understanding of the  
33 disease), predictive analytics (to forecast the near-term impact  
34 and longer-term dynamics of the pandemic), and prescriptive  
35 analytics (to support healthcare and policy decision-making).

36 Specifically, our approach comprises four steps (Figure 1):  
37 • *Aggregating and visualizing the most comprehensive clini-*  
38 *cal database on COVID-19 (Section 1).* We aggregate  
39 cohort-level data on demographics, comorbidities, symp-  
40 toms and lab values from 160 clinical studies. These data  
41 paint a broad picture of the disease, identifying common  
42 symptoms, disparities between mild and severe patients,

## Significance Statement

In the midst of the COVID-19 pandemic, healthcare providers and policy makers are wrestling with unprecedented challenges. How to treat COVID-19 patients with equipment shortages? How to allocate resources to combat the disease? How to plan for the next stages of the pandemic? We present a data-driven approach to tackle these challenges. We gather comprehensive data from various sources, including clinical studies, electronic medical records, and census reports. We develop algorithms to understand the disease, predict its mortality, forecast its spread, inform social distancing policies, and re-distribute critical equipment. These algorithms provide decision support tools that have been deployed on our publicly available website, and are actively used by hospitals, companies, and policy makers around the globe.

D.B., R.C.W., A.D., A.J., D.L.K., M.L., O.N., A.O., I.P., J.P., O.S.L., B.S., H.T.B. and H.W. designed research; L.B., R.C.W., A.D., V.D., A.J., D.L.K., G.L., M.L., L.M., A.O., T.P., I.P., J.P., O.S.L., B.S., H.T.B., K.V.C., H.W. and C.Z. performed research; R.C.W., A.D., D.L.K., M.L., L.M., A.O., T.P., I.P., J.P., O.S.L., B.S., H.T.B., and H.W. analyzed data; D.B., R.C.W., A.D., A.J., M.L., O.N., A.O., J.P., H.T.B. and H.W. wrote the paper.

No author has any competing interest to declare.

<sup>1</sup>To whom correspondence should be addressed. E-mail: dbertsim@mit.edu

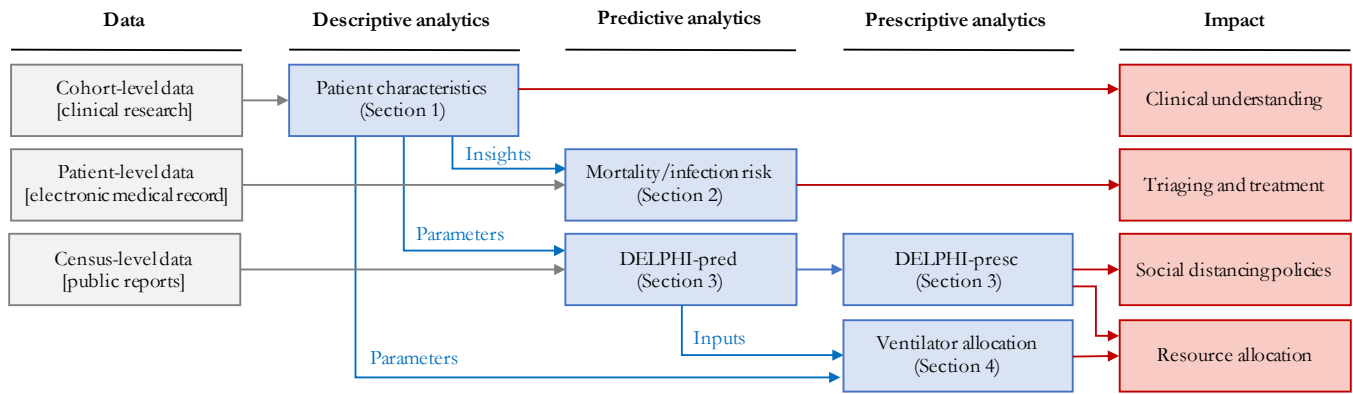

**Fig. 1.** Overview of our end-to-end analytics approach. We leverage diverse data sources to inform a family of descriptive, predictive and prescriptive tools for clinical and policy decision-making support.

43 and geographic disparities—insights that are hard to derive from any single study and can orient future clinical  
 44 research on COVID-19, its mutations, and its disparate  
 45 effects across ethnic groups.  
 46

- 47 • *Providing personalized indicators to assess the risk of*  
 48 *mortality and infection (Section 2).* Using patient-level  
 49 data, we develop machine learning models to predict  
 50 mortality and infection risk, as a function of demographics,  
 51 symptoms, comorbidities, and lab values. Using gradient  
 52 boosting methods, the models achieve strong predictive  
 53 performance—with an out-of-sample area under the curve  
 54 above 90%. These models yield personalized calculators  
 55 that can (i) guide triage, treatment, and care management  
 56 decisions for strained healthcare systems, and (ii) serve as  
 57 pre-screening tools for patients before they visit healthcare  
 58 or testing facilities.
- 59 • *Developing a novel epidemiological model to forecast the*  
 60 *evolution of the disease and assess the effects of social*  
 61 *distancing (Section 3).* We propose a new compartmental  
 62 model called DELPHI, which accounts for COVID-19 fea-  
 63 tures such as underdetection and government response.  
 64 The model estimates the disease’s spread with high accu-  
 65 racy; notably, its projections from as early as April 3  
 66 have matched the number of cases observed in the United  
 67 States up to mid-May. We also provide a data-driven  
 68 assessment of social distancing policies, showing that the  
 69 pandemic’s spread is highly sensitive to the stringency  
 70 and timing of mitigating measures.
- 71 • *Proposing an optimization model to support ventilator*  
 72 *allocation in response to the pandemic (Section 4).* We  
 73 formulate a mixed-integer optimization model to allocate  
 74 ventilators efficiently in a semi-collaborative setting where  
 75 resources can be shared both between healthcare facilities  
 76 or through a central authority. In the United States,  
 77 this allows us to study the trade-offs of managing the  
 78 federal ventilator stockpile in conjunction with inter-state  
 79 transfers. Results show that limited ventilator transfers  
 80 could have eliminated shortages in April 2020.

81 A major contribution of our work is to treat these dif-  
 82 ferent questions as interdependent challenges raised by the  
 83 pandemic—as opposed to a series of isolated problems. Indeed,  
 84 clinical decision-making depends directly on patient inflows  
 85 and available supplies, while resource planning and govern-

86 ment responses react to patient-level outcomes. By combining  
 87 various data sources into descriptive, predictive and prescrip-  
 88 tive methods, this paper proposes an end-to-end approach to  
 89 design a comprehensive and cohesive response to COVID-19.

90 Ultimately, this paper develops analytical tools to inform  
 91 clinical and policy responses to the COVID-19 pandemic.  
 92 These tools are available to the public on a dedicated web-  
 93 site.\* They have also been deployed in practice to combat  
 94 the spread of COVID-19 globally. Several hospitals in Europe  
 95 have used our risk calculators to support pre-triage and post-  
 96 triage decisions, and a major financial institution in South  
 97 America is applying our infection risk calculator to determine  
 98 how employees can safely return to work. A major hospital  
 99 system in the United States planned its intensive care unit  
 100 (ICU) capacity based on our forecasts, and leveraged our opti-  
 101 mization results to allocate ventilators across hospitals when  
 102 the number of cases was rising. Our epidemiological predic-  
 103 tions are used by a major pharmaceutical company to design  
 104 a vaccine distribution strategy that can contain future phases  
 105 of the pandemic. They have also been incorporated into the  
 106 US Center for Disease Control’s forecasts (7).

## 107 1. Descriptive Analytics: Clinical Outcomes Database

108 Early responses to the COVID-19 pandemic have been in-  
 109 hibited by the lack of available data on patient outcomes.  
 110 Individual centers released reports summarizing patient char-  
 111 acteristics. Yet, this decentralized effort makes it difficult to  
 112 construct a cohesive picture of the pandemic.

113 To address this problem, we construct a database that ag-  
 114 gregates demographics, comorbidities, symptoms, laboratory  
 115 blood test results (“lab values”, henceforth) and clinical out-  
 116 comes from 160 clinical studies released between December  
 117 2019 and May 2020—made available on our website for broader  
 118 use. The database contains information on 133,600 COVID-19  
 119 patients (3.13% of the global COVID-19 patients as of May  
 120 12, 2020), spanning mainly Europe (81,207 patients), Asia  
 121 (19,418 patients) and North America (23,279 patients). To  
 122 our knowledge, this is the largest dataset on COVID-19.

123 **A. Data Aggregation.** Each study was read by an MIT re-  
 124 searcher, who transcribed numerical data from the manuscript.  
 125 The appendix reports the main transcription assumptions.

\*[www.covidanalytics.io](http://www.covidanalytics.io)

Each row in the database corresponds to a cohort of patients—some papers study a single cohort, whereas others study several cohorts or sub-cohorts. Each column reports cohort-level statistics on demographics (e.g., average age, gender breakdown), comorbidities (e.g., prevalence of diabetes, hypertension), symptoms (e.g., prevalence of fever, cough), treatments (e.g., prevalence of antibiotics, intubation), lab values (e.g., average lymphocyte count), and clinical outcomes (e.g., average hospital length of stay, mortality rate). We also track whether the cohort comprises “mild” or “severe” patients (mild and severe cohorts are only a subset of the data).

Due to the pandemic’s urgency, many papers were published before all patients in a cohort were discharged or deceased. Accordingly, we estimate the mortality rate from discharged and deceased patients only (referred to as “Projected Mortality”).

**B. Objectives.** Our main goal is to leverage this database to derive a macroscopic understanding of the disease. We break it down into the following questions:

- Which symptoms are most prevalent?
- How do “mild” and “severe” patients differ in terms of symptoms, comorbidities, and lab values?
- Can we identify epidemiological differences in different parts of the world?

**C. Descriptive Statistics.** Table 1 depicts the prevalence of COVID-19 symptoms, in aggregate, classified into “mild” or “severe” patients, and classified per geographic region. Our key observations are that:

- Cough, fever, shortness of breath, and fatigue are the most prevalent symptoms of COVID-19.
- COVID-19 symptoms are much more diverse than those listed by public health agencies. COVID-19 patients can experience at least 15 different symptoms. In contrast, the US Center for Disease Control and Prevention lists seven symptoms (cough, shortness of breath, fever, chills, myalgia, sore throat, and loss of taste/smell) (8); the World Health Organization lists three symptoms (fever, cough, and fatigue) (9); and the UK National Health Service lists two main symptoms (fever and cough) (10). This suggests a lack of consensus among the medical community, and opportunities to revisit public health guidelines to capture the breadth of observed symptoms.
- Shortness of breath and elevated respiratory rates are much more prevalent in cases diagnosed as severe.
- Symptoms are quite different in Asia vs. Europe or North America. In particular, more than 75% of Asian patients experience fever, as compared to less than half in Europe and North America. Conversely, shortness of breath is much more prevalent in Europe and North America.

Using a similar nomenclature, Figure 2A reports demographics, comorbidities, lab values, and clinical outcomes (an extended version is available in the appendix). In terms of demographics, severe populations of patients have a higher incidence of male subjects and are older on average. Severe patients also have elevated comorbidity rates. Figures 2B and 2C visually confirm the impact of age and hypertension rates on population-level mortality—consistent with (11–13). In terms of lab values, CRP, AST, BUN, IL-6 and Protocalcitonin are highly elevated among severe patients.

**D. Discussion and Impact.** Our database is the largest available source of clinical information on COVID-19 assembled to date. As such, it provides new insights on common symptoms and the drivers of the disease’s severity. Ultimately, this database can support guidelines from health organizations, and contribute to ongoing clinical research on the disease.

Another benefit of this database is its geographical reach. Results highlight disparities in patients’ symptoms across regions. These disparities may stem from (i) different reporting criteria; (ii) different treatments; (iii) disparate impacts across different ethnic groups; and (iv) mutations of the virus since it first appeared in China. This information contributes to early evidence on COVID-19 mutations (14, 15) and on its disparate effects on different ethnic groups (16, 17).

Finally, the database provides average values of key parameters into our epidemiological model of the disease’s spread and our optimization model of resource allocation (e.g., average length of stay of hospitalizations, average fraction of hospitalized patients put on a ventilator).

The insights derived from this descriptive analysis highlight the need for personalized data-driven clinical indicators. Yet, our population-level database cannot be leveraged directly to support decision-making at the patient level. We have therefore initiated a multi-institution collaboration to collect electronic medical records from COVID-19 patients and develop clinical risk calculators. These calculators, presented in the next section, are informed by several of our descriptive insights. Notably, the disparities between severe patients and the rest of the patient population inform the choice of the features included in our mortality risk calculator. Moreover, the geographic disparities suggest that data from Asia may be less predictive when building infection or mortality risk calculators designed for patients in Europe or North America—motivating our use of data from Europe.

## 2. Predictive Analytics: Mortality and Infection Risk

Throughout the COVID-19 crisis, physicians have made difficult triage and care management decisions on a daily basis. Oftentimes, these decisions could only rely on small-scale clinical tests, each requiring significant time, personnel and equipment and thus cannot be easily replicated. As the burden on “hot spots” has ebbed, hospitals began to aggregate rich data on COVID-19 patients. This data offers opportunities to develop algorithmic risk calculators for large-scale decision support—ultimately facilitating a more proactive and data-driven strategy to combat the disease globally.

We have established a patient-level database of thousands of COVID-19 hospital admissions. Using state-of-the-art machine learning methods, we develop a *mortality risk calculator* and an *infection risk calculator*. Together, these two risk assessments provide screening tools to support critical care management decisions, spanning patient triage, hospital admissions, bed assignment and testing prioritization. A more detailed model for mortality with lab values is presented in (18).

**A. Methods.** This investigation constitutes a multi-center study from healthcare institutions in Spain and Italy, two countries severely impacted by COVID-19. Specifically, we collected data from (i) Azienda Socio-Sanitaria Territoriale di Cremona (ASST Cremona), the main hospital network in the Province of Cremona, and (ii) HM Hospitals, a leading

**Table 1. Count and prevalence of symptoms among COVID-19 patients, in aggregate, broken down into mild/severe patients, and broken down per continent (Asia, Europe, North America). Mild and severe patients only form a subset of the data, and so do patients from Asia, Europe and North America. A “-” indicates that fewer than 100 patients in a subpopulation reported on this symptom.**

| Symptom          | All patients |       | Mild  |       | Severe |       | Asia   |       | Europe |       | North America |       |
|------------------|--------------|-------|-------|-------|--------|-------|--------|-------|--------|-------|---------------|-------|
|                  | Count        | (%)   | Count | (%)   | Count  | (%)   | Count  | (%)   | Count  | (%)   | Count         | (%)   |
| Cough            | 94,950       | 52.8% | 6,833 | 63.0% | 5,803  | 50.4% | 14,034 | 56.2% | 78,430 | 52.2% | 1,113         | 63.6% |
| Fever            | 95,870       | 48.1% | 6,864 | 79.3% | 6,077  | 76.7% | 14,750 | 76.6% | 78,450 | 43.5% | 1,481         | 41.3% |
| Short Breath     | 17,290       | 33.7% | 6,006 | 16.1% | 5,373  | 60.7% | 11,330 | 19.7% | 3,512  | 69.9% | 1,111         | 49.2% |
| Fatigue          | 11,560       | 31.4% | 5,313 | 35.3% | 1,989  | 40.6% | 11,320 | 30.8% | 226    | 64.2% | -             | -     |
| Sputum           | 7,613        | 26.3% | 4,995 | 29.2% | 1,216  | 34.2% | 7,395  | 26.7% | -      | -     | 176           | 10.9% |
| Sore Throat      | 83,170       | 22.2% | 3,513 | 14.2% | 921    | 8.2%  | 6,013  | 10.4% | 75,235 | 22.9% | 550           | 9.8%  |
| Myalgia          | 12,150       | 17.5% | 4,455 | 16.4% | 1,643  | 19.1% | 8,517  | 15.5% | 1,633  | 33.5% | 755           | 25.3% |
| Elev. Resp. Rate | 7,376        | 16.4% | 527   | 9.7%  | 642    | 38.4% | 1,257  | 14.6% | -      | -     | 6,117         | 16.8% |
| Anorexia         | 3,928        | 15.8% | 1,641 | 14.2% | 808    | 15.4% | 3,566  | 13.8% | 312    | 40.5% | -             | -     |
| Headache         | 11,430       | 15.7% | 5,068 | 12.2% | 1,541  | 8.6%  | 7,929  | 9.9%  | 1,633  | 27.2% | 551           | 8.7%  |
| Nausea           | 10,070       | 12.4% | 4,238 | 6.5%  | 1,798  | 5.6%  | 8,262  | 8.2%  | 312    | 22.4% | 259           | 9.0%  |
| Chest Pain       | 3,303        | 11.3% | 767   | 12.2% | 588    | 19.6% | 2,984  | 12.2% | -      | -     | -             | -     |
| Diarrhea         | 16,520       | 11.1% | 5,687 | 9.7%  | 5,369  | 9.0%  | 11,470 | 10.8% | 3,512  | 10.4% | 1,066         | 15.4% |
| Cong. Airway     | 1,639        | 8.7%  | 2,176 | 6.5%  | 234    | 14.1% | 1,369  | 8.9%  | -      | -     | 258           | 7.4%  |
| Chills           | 3,116        | 8.7%  | 2,751 | 9.9%  | 520    | 9.4%  | 2,794  | 8.2%  | -      | -     | 268           | 11.5% |
| Proj. Mortality  | 111,700      | 11.7% | 7,428 | 0.4%  | 9,146  | 74.0% | 12,820 | 16.7% | 79,750 | 9.9%  | 19,060        | 15.8% |

| Feature                                            | All   | Mild  | Severe |
|----------------------------------------------------|-------|-------|--------|
| <b>Demographics</b>                                |       |       |        |
| Male (%)                                           | 53.0% | 48.8% | 68.7%  |
| Age (years)                                        | 51.3  | 46.1  | 68.2   |
| White/European (%)                                 | 22.2% | 9.7%  | 63.9%  |
| African American (%)                               | 5.4%  | 3.5%  | 2.5%   |
| Asian (%)                                          | 51.3% | 80.2% | 31.2%  |
| Hispanic/Latino                                    | 19.9% | 0%    | 0%     |
| Multiple ethnicities/other                         | 3.6%  | 6.9%  | 2.7%   |
| <b>Comorbidities</b>                               |       |       |        |
| Smoking history                                    | 16.1% | 12.2% | 16.6%  |
| Hypertension                                       | 35.9% | 15.2% | 54.4%  |
| Diabetes                                           | 20.8% | 6.8%  | 26.1%  |
| Cardio Disease                                     | 12.4% | 3.0%  | 20.3%  |
| COPD                                               | 6.0%  | 2.8%  | 10.0%  |
| Cancer                                             | 7.2%  | 3.2%  | 12.9%  |
| Liver Disease                                      | 2.8%  | 2.3%  | 3.5%   |
| Cerebrovascular                                    | 9.8%  | 2.7%  | 24.8%  |
| Kidney Disease                                     | 5.7%  | 1.2%  | 10.8%  |
| <b>Lab values</b>                                  |       |       |        |
| White Blood Cells Count (WBC) (10 <sup>9</sup> /L) | 6.41  | 5.07  | 6.80   |
| Neutrophil Count (10 <sup>9</sup> /L)              | 4.72  | 5.12  | 5.78   |
| Platelet Count (10 <sup>9</sup> /L)                | 195.7 | 184.0 | 170.4  |
| Alanine Aminotransferase (ALT) (U/L)               | 29.0  | 24.6  | 31.1   |
| Aspartate Aminotransferase (AST) (U/L)             | 37.3  | 27.1  | 45.7   |
| Blood Urea Nitrogen Count (BUN) (mmol/L)           | 5.22  | 4.18  | 6.86   |
| Creatinine (μmol/L)                                | 63.08 | 66.0  | 56.4   |
| C-Reactive Protein Count (CRP) (mg/L)              | 76.5  | 18.9  | 94.1   |
| Interleukin-6 (IL-6) (pg/mL)                       | 24.57 | 4.17  | 38.63  |
| Procalcitonin (ng/mL)                              | 2.26  | 1.85  | 4.81   |
| Length of Stay (days)                              | 10.7  | 14.0  | 7.97   |

**A**

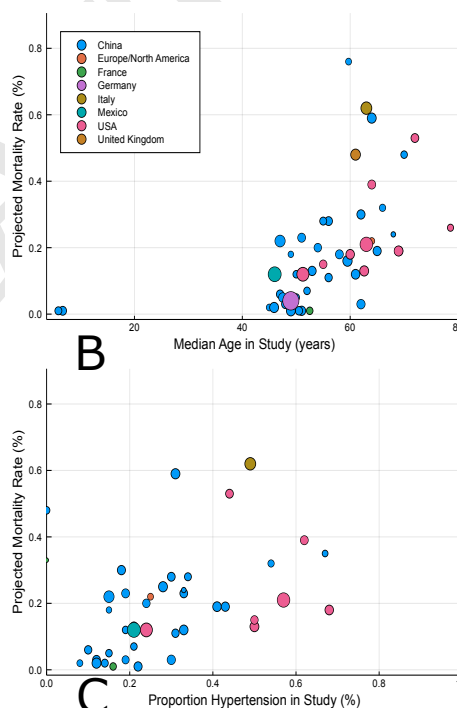

**Fig. 2.** Summary of demographics, comorbidities and lab values in mild and severe COVID-19 patients. (A) Comorbidities, demographics, average lab values, average length of stay and projected mortality among COVID-19 patients, in aggregate and broken down into mild/severe patients. (B) Impact of median age on projected mortality at a cohort level. (C) Impact of hypertension rates on projected mortality at a cohort level. The size of each dot represents the number of patients in the cohort, and its color represents the nation the study was performed in. We only include studies reporting both discharged and deceased patients.

243 hospital group in Spain with 15 general hospitals and 21 clinical  
 244 centers spanning the regions of Madrid, Galicia, and León.  
 245 We applied the following inclusion criteria to the calculators:

- 246 • **Mortality Risk:** We include adult patients diagnosed with  
 247 COVID-19 and hospitalized. We consider patients  
 248 who were either discharged from the hospital or deceased

within the visit—excluding active patients. We include  
 only lab values and vital values collected on the first day in  
 the emergency department to match the clinical decision  
 setting—predicting prognosis at the time of admission.

- **Infection Risk:** We include adult patients who underwent a polymerase chain reaction test for detecting



COVID-19 infection at the ASST Cremona hospital (19).<sup>†</sup> We include all patients, regardless of their clinical outcome. Each patient was subject to a blood test. We omit comorbidities since they are derived from the discharge diagnoses, hence not available for all patients.

We train two models for each calculator: one with lab values and one without lab values. Missing values are imputed using  $k$ -nearest neighbors imputation (20). We exclude features missing for more than 40% of patients. We train binary classification models for both risk calculators, using the XGBoost algorithm (21). We restrict the model to select at most 20 features, in order to make the resulting tool easily usable. We use SHapley Additive exPlanations (SHAP) (22, 23) to generate importance plots that identify risk drivers and provide transparency on the model predictions.

To evaluate predictive performance, we use 40 random data partitions into training and test sets. We compute the average Area Under the Curve (AUC), sensitivity, specificity, precision, negative predictive value, and positive predictive value. We calculate 95% confidence intervals using bootstrapping.

## B. Results.

**Study Population.** The mortality study population comprises 2,831 patients, 711 (25.1%) of whom died during hospitalization while the remaining ones were discharged. The infection study population comprises 3,135 patients, 1,661 (53.0%) of whom tested positive for COVID-19. The full distributions of patient characteristics are reported in the appendix.

**Performance Evaluation.** All models achieve strong out-of-sample performance. Our mortality risk calculator has an AUC of 93.8% with lab values and 90.5% without lab values. Our infection risk calculator has an AUC of 91.8% with lab values and 83.1% without lab values. These values suggest a strong discriminative ability of the proposed models. We report in the appendix average results across all random data partitions.

We also report in the appendix threshold-based metrics, which evaluate the discriminative ability of the calculators at a fixed cutoff. With the threshold set to ensure a sensitivity of at least 90% (motivated by the high costs of false negatives), we obtain accuracies spanning 65%–80%.

The mortality model achieves better overall predictive performance than the infection model. As expected, both models have better predictive performance with lab values than without lab values. Yet, the models without lab values still achieve strong predictive performance.

**Model Interpretation.** Figure 3 plots the SHAP importance plots for all models. The figures sort the features by decreasing significance. For each one, the row represents its impact on the SHAP value, as the feature ranges from low (blue) to high (red). Higher SHAP values correspond to increased likelihood of a positive outcome (i.e. mortality or infection). Features with the color scale oriented blue to red (resp. red to blue) from left to right have increasing (resp. decreasing) risk as the feature increases. For example, “Age” is the most important feature of the mortality score with lab values (Figure 3A), and older patients have higher predicted mortality.

<sup>†</sup>HM Hospitals patients were not included since no negative case data was available.

**C. Discussion and Impact.** The models with lab values provide algorithmic screening tools that can deliver COVID-19 risk predictions using common clinical features. In a constrained healthcare system or in a clinic without access to advanced diagnostics, clinicians can use these models to rapidly identify high-risk patients to support triage and treatment decisions.

The models without lab values offer an even simpler tool that could be used outside of a clinical setting. In strained healthcare systems, it can be difficult for patients to obtain direct advice from providers. Our tool could serve as a pre-screening step to identify personalized infection risk—without visiting a testing facility. While the exclusion of lab values reduces the AUC (especially for infection), these calculators still perform strongly.

Our models provide insights into risk factors and biomarkers related to COVID-19 infection and mortality. Our results suggest that the main indicators of mortality risk are age, BUN, CRP, AST, and low oxygen saturation. These findings validate several population-level insights from Section 1 and are in agreement with clinical studies: prevalence of shortness of breath (24), elevated levels of CRP as an inflammatory marker (25, 26), and elevated AST levels due to liver dysfunction in severe COVID-19 cases (11, 27).

Turning to infection risk, the main indicators are CRP, WBC, Calcium, AST, and temperature. These findings are also in agreement with clinical reports: an elevated CRP generally indicates an early sign of infection and implies lung lesions from COVID-19 (28), elevated levels of leukocytes suggest cytokine release syndrome caused by SARS-CoV-2 virus (29), and lowered levels of serum calcium signal higher rate of organ injury and septic shock (30). The agreement between our findings and clinical observations offers credibility for the use of our calculators to support clinical decision-making—although they are not intended to substitute clinical diagnostic or medical expertise.

When lab values are not available, the widely accepted risk factors of age, oxygen saturation, temperature, and heart rate become the key indicators for both risk calculators. We observe that mortality risk is higher for male patients (blue in Figure 3B) than for female patients (red), confirming clinical reports (31, 32). An elevated respiratory frequency becomes an important predictor of infection, as reported in (33). These findings suggest that demographics and vitals provide valuable information in the absence of lab values. However, when lab values are available, these other features become secondary.

A limitation of the current mortality model is that it does not take into account medication and treatments during hospitalization. We intend to incorporate these in future research to make these models more actionable. Furthermore, these models aim to reveal associations between risks and patient characteristics but are not designed to establish causality.

Overall, we have developed data-driven calculators that allow physicians and patients to assess mortality and infection risks in order to guide care management—especially with scarce healthcare resources. These calculators are being used by several hospitals within the ASST Cremona system to support triage and treatment decisions—alleviating the toll of the pandemic. Our infection calculator also supports safety protocols for Banco de Credito del Peru, the largest bank in Peru, to determine how employees can return to work.

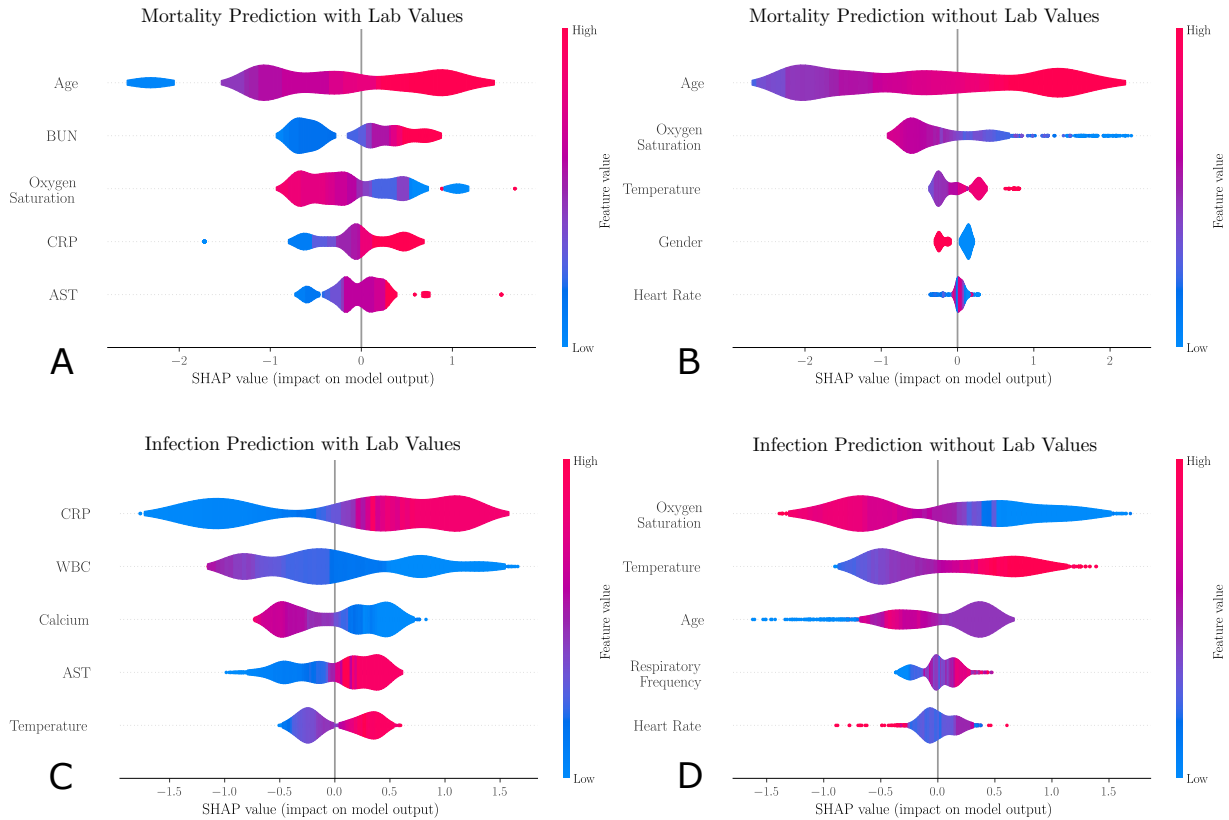

**Fig. 3.** SHapley Additive exPlanations (SHAP) importance plots for the mortality and infection risk calculators, including: (A) the mortality model with lab values; (B) the mortality model without lab values; (C) the infection model with lab values; and (D) the infection model without lab values. The five most important features are shown for each model. Gender is a binary feature (female is equal to 1, shown in red; male is equal to 0, shown in blue). Each row represents the impact of a feature on the outcome, with higher SHAP values indicating higher likelihood of a positive outcome.

### 3. Predictive and Prescriptive Analytics: Disease Projections and Government Response

We develop a new epidemiological model, called DELPHI (Differential Equations Leads to Predictions of Hospitalizations and Infections). The model first provides a predictive tool to forecast the number of detected cases, hospitalizations and deaths—we refer to this model as “DELPHI-pred”. It then provides a prescriptive tool to simulate the effect of policy interventions and guide government response to the COVID-19 pandemic—we refer to this model as “DELPHI-presc”. All models are fit in each US state (plus the District of Columbia). A detailed presentation and discussion on the implications of the DELPHI model especially with respect to government interventions is presented in (34).

#### A. DELPHI-pred: Projecting Early Spread of COVID-19.

**A.1. Model Development.** DELPHI is a compartmental model, with dynamics governed by ordinary differential equations. It extends the standard SEIR model by defining 11 states (Figure 4A): susceptible ( $S$ ), exposed ( $E$ ), infectious ( $I$ ), undetected people who will recover ( $U_R$ ) or decease ( $U_D$ ), detected hospitalized people who will recover ( $DH_R$ ) or decease ( $DH_D$ ), quarantined people who will recover ( $DQ_R$ ) or decease ( $DQ_D$ ), recovered ( $R$ ) and deceased ( $D$ ). The separation of the  $U_R/U_D$ ,  $DQ_R/DQ_D$  and  $DH_R/DH_D$  states enables separate fitting of

recoveries and deaths from the data.

As opposed to other COVID-19 models (see, e.g., 35), DELPHI captures two key elements of the pandemic:

- **Underdetection:** Many cases remain undetected due to limited testing, record failures, and detection errors. Ignoring them would underestimate the scale of the pandemic. We capture them through the  $U_R$  and  $U_D$  states.
- **Government Response:** “Social distancing” policies limit the spread of the virus. Ignoring them would overestimate the spread of the pandemic. We model them through a decline in the infection rate over time. Specifically, we write:  $\frac{dS}{dt} = -\alpha\gamma(t)S(t)I(t)$ , where  $\alpha$  is a constant baseline rate and  $\gamma(t)$  is a time-dependent function characterizing each state’s policies, modeled as follows:

$$\gamma(t) = \frac{2}{\pi} \arctan\left(\frac{-(t-t_0)}{k}\right) + 1.$$

The inverse tangent function provides a concave-convex relationship, capturing three phases of government response. In *Phase I*, most activities continue normally as people adjust their behavior. In *Phase II*, the infection rate declines sharply as policies are implemented. In *Phase III*, the decline in the infection rate reaches saturation. The parameters  $t_0$  and  $k$  can be respectively thought of as the start date and the strength of the response.

417 Ultimately, DELPHI involves 13 parameters that define  
418 the transition rates between the 11 states. We calibrate six of  
419 them from our clinical outcomes database (Section 1). Using  
420 non-linear optimization, we estimate seven parameters for each  
421 US state from the data to minimize in-sample error. This  
422 training procedure leverages historical data on the number of  
423 cases and deaths per US county (36). We include each state  
424 as soon as it records more than 100 cases. We provide details  
425 on the fitting procedure in the appendix.

426 **A.2. Validation.** DELPHI was created in late March and has been  
427 continuously updated to reflect new observed data. Figure 4B  
428 shows our projections made on three different dates, and  
429 compares them against historical observations. This plot  
430 focuses on the number of cases, but a similar plot for the  
431 number of deaths is reported in the appendix.

432 In addition to providing aggregate validation figures, we  
433 also evaluate the model’s out-of-sample performance quanti-  
434 tatively, using a backtesting procedure. To our knowledge,  
435 this represents the first attempt to assess the predictive per-  
436 formance of COVID-19 projections. Specifically, we fit the  
437 model’s parameters using data up to April 27, build projec-  
438 tions from April 28 to May 12, and evaluate the resulting  
439 Mean Absolute Percentage Error (MAPE). Figure 4C reports  
440 the results in each US state.

441 **A.3. Discussion and Impact.** Results suggest that DELPHI-pred  
442 achieves strong predictive performance. The model has been  
443 consistently predicting, with high accuracy the overall spread  
444 of the disease for several weeks. Notably, DELPHI-pred was  
445 able to anticipate, as early as April 3rd, the dynamics of the  
446 pandemic in the United States up to mid-May. At a time  
447 where 200,000–300,000 cases were reported, the model was  
448 predicting 1.2M–1.4M cases by mid-May—a prediction that  
449 proved accurate 40 days later.

450 Our quantitative results confirm the visual evidence. The  
451 MAPE is small across US states. The median MAPE is 8.5%  
452 for the number of cases—the 10% and 90% percentiles are  
453 equal to 1.9% and 16.7%. The median MAPE is 7.8% for the  
454 number of deaths—the 10% and 90% percentiles are equal  
455 to 3.3% and 25.1%. Given the high level of uncertainty and  
456 variability in the disease’s spread, this level of accuracy is  
457 suggestive of excellent out-of-sample performance.

458 As Figure 4C shows, a limitation of our model is that  
459 the relative error remains large for a small minority of US  
460 states. These discrepancies stem from two main reasons. First,  
461 errors are typically larger for states that have recorded few  
462 cases (WY) or few deaths (AK, KS, NE). Like all SEIR-  
463 derived models, DELPHI performs better on large populations.  
464 Moreover, the MAPE metric emphasizes errors on smaller  
465 population counts. Second, our model is fitted at the state  
466 level, implicitly assuming that the spread of the pandemic is  
467 independent from one state to another—thus ignoring inter-  
468 state travel. This limitation helps explain the above-median  
469 error in a few heartland states which were confronted to the  
470 pandemic in later stages (MN, TN, IA).

471 In summary, DELPHI-pred is a novel epidemiological model  
472 of the pandemic, which provides high-quality estimates of  
473 the daily number of cases and deaths per US state. This  
474 model has been incorporated to the forecasts used by the US  
475 Center for Disease Control to chart and anticipate the spread  
476 of the pandemic (7). It has also been used by the Hartford

HealthCare system—the major hospital system in Connecticut,  
US—to plan its ICU capacity, and by a major pharmaceutical  
company to design a vaccine distribution strategy that can  
most effectively contain the next phases of the pandemic.

**B. DELPHI-presc: Toward Re-opening Society.** To inform the  
relaxation of social distancing policies, we link policies to the  
infection rate using machine learning. Specifically, we predict  
the values of  $\gamma(t)$ , obtained from the fitting procedure of  
DELPHI-pred. For simplicity and interpretability, we consider  
a simple model based on regression trees (37) and restrict the  
independent variables to the policies in place. We classify  
policies based on whether they restrict mass gatherings, school  
and/or other activities (referred to as “Others”, and including  
business closures, severe travel limitations and/or closing of  
non-essential services). We define a set of seven mutually  
exclusive and collectively exhaustive policies observed in the  
US data: (i) *No measure*; (ii) *Restrict mass gatherings*; (iii)  
*Restrict others*; (iv) *Authorize schools, restrict mass gatherings  
and others*; (v) *Restrict mass gatherings and schools*; (vi)  
*Restrict mass gatherings, schools and others*; and (vii) *Stay-  
at-home*.

We report the regression tree in the appendix, obtained  
from state-level data in the United States. This model achieves  
an out-of-sample  $R^2$  of 0.8, suggesting a good fit to the data.  
As expected, more stringent policies lead to lower values of  
 $\gamma(t)$ . The results also provide comparisons between various  
policies—for instance, school closures seem to induce a stronger  
reduction in the infection rate than restricting “other” activ-  
ities. More importantly, the model quantifies the impact of  
each policy on the infection rate. We then use these results  
to predict the value of  $\gamma(t)$  as a function of the policies (see  
appendix for details), and simulate the spread of the disease  
as states progressively loosen social distancing policies.

Figure 4D plots the projected case count in the state of New  
York (NY), for different policies (we report a similar plot for  
the death count in the appendix). Note that the stringency of  
the policies has a significant impact on the pandemic’s spread  
and ultimate toll. For instance, relaxing all social distancing  
policies on May 12 can increase the *cumulative* number of  
cases in NY by up to 25% by September.

Using a similar nomenclature, Figure 4E shows the case  
count if all social distancing policies are relaxed on May 12 vs.  
May 26. Note that the timing of the policies also has a strong  
impact: a two-week delay in re-opening society can greatly  
reduce a resurgence in NY.

The road back to a new normal is not straightforward:  
results suggest that the disease’s spread is highly sensitive to  
both the intensity and the timing of social distancing policies.  
As governments grapple with an evolving pandemic, DELPHI-  
presc can be a useful tool to explore alternative scenarios and  
ensure that critical decisions are supported with data.

#### 4. Prescriptive Analytics: Ventilator Allocation

COVID-19 is primarily an acute respiratory disease. The  
World Health Organization recommends that patients with  
oxygen saturation levels below 93% receive respiratory sup-  
port (9). Following the standard Acute Respiratory Distress  
Syndrome protocol, COVID-19 patients are initially put in the  
prone position and then put in a drug induced paralysis via a  
neuromuscular blockade to prevent lung injury (38). Patients

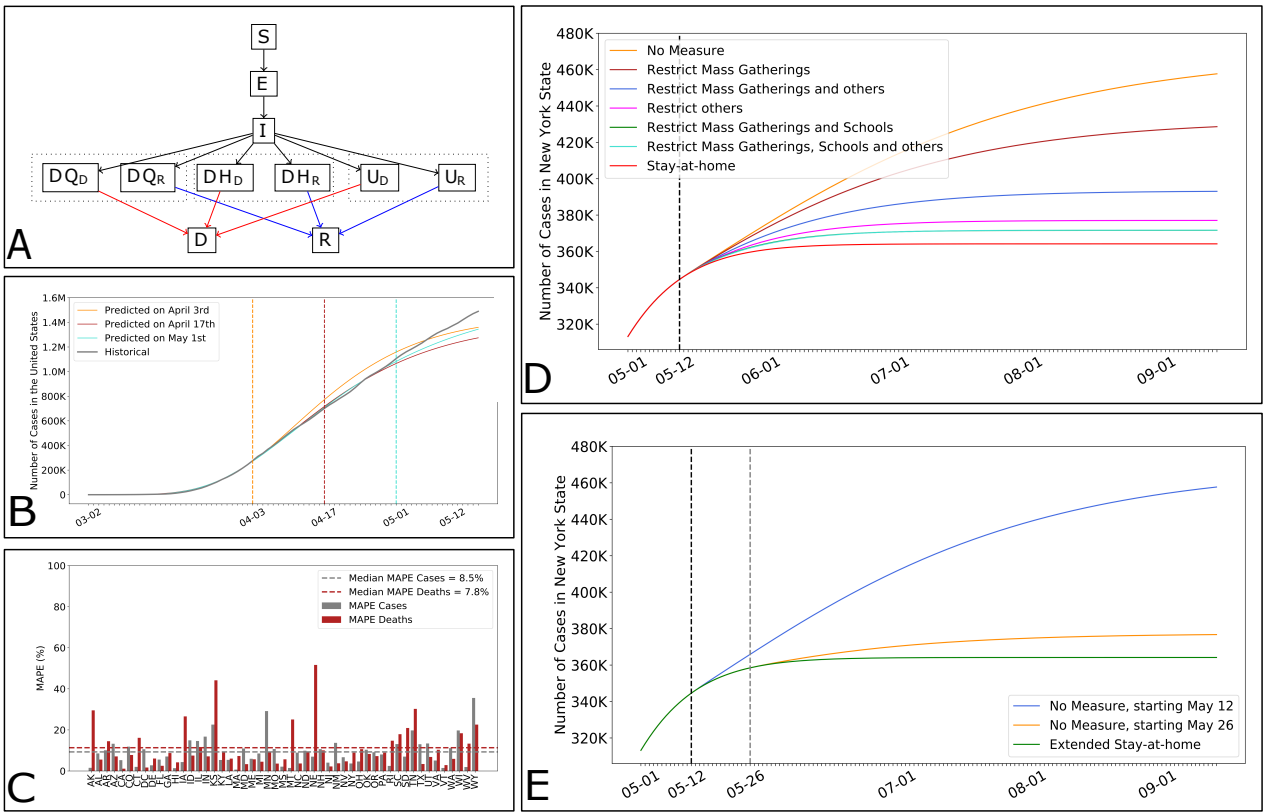

**Fig. 4.** DELPHI, an epidemiological model to guide government response. (A) Simplified flow diagram of DELPHI. (B) Cumulative number of cases in the United States according to our projections made at different points in time, against actual observations. (C) Out-of-sample Mean Absolute Percentage Error (MAPE) on the number of cases and deaths per US state. (D) Impact of different policies on the future number of cases, in NY. (E) Impact of the timing of policies on the future number of cases, in NY.

536 are then put on a ventilator, which delivers high concentrations of  
 537 oxygen while removing carbon dioxide (39). Early evidence  
 538 suggests that ventilator intubation reduces the risk of hypoxia  
 539 for COVID-19 patients (40).

540 As a result, hospitals have been facing ventilator shortages  
 541 worldwide (41). Still, local shortages do not necessarily imply  
 542 global shortages. For instance, in April 2020, the total supply  
 543 of ventilators in the United States exceeded the projected  
 544 demand from COVID-19 patients. Ventilator shortages could  
 545 thus be alleviated by pooling the supply, i.e., by strategically  
 546 allocating the surge supply of ventilators from the federal  
 547 government and facilitating inter-state transfers of ventilators.

548 We propose an optimization model to support the allocation  
 549 of ventilators in a semi-collaborative setting where resources  
 550 can be shared both between healthcare facilities or through  
 551 a central authority. Based on its primary motivation, we  
 552 formulate the model to support the management of the federal  
 553 supply of ventilators and inter-state ventilator transfers in the  
 554 United States. A similar model has also been used to support  
 555 inter-hospital transfers of ventilators. The model can also  
 556 support inter-country ventilator allocation during the next  
 557 phases of the pandemic. This model leverages the demand  
 558 projections from DELPHI-pred (Section 3) to prescribe resource  
 559 allocation recommendations—with the ultimate goal of  
 560 alleviating the health impact of the pandemic.

561 **A. Model.** Resource allocation is critical when clinical care  
 562 depends on scarce equipment. Several studies have used  
 563 optimization to support ventilator pooling. A time-independent

564 model was first developed for influenza planning (42). A time-  
 565 dependent stochastic optimization model was developed to  
 566 support transfers to and from the federal government for COVID-  
 567 19, given scenarios regarding the pandemic's spread (43). In  
 568 this section, we propose a deterministic time-dependent model,  
 569 leveraging the projections from DELPHI-pred.

570 We model ventilator pooling as a multi-period resource  
 571 allocation over  $S$  states and  $D$  days. The model takes as input  
 572 ventilator demand in state  $s$  and day  $d$ , denoted as  $v_{s,d}$ , as  
 573 well as parameters capturing the surge supply from the federal  
 574 government and the extent of inter-state collaboration. We  
 575 formulate an optimization problem that decides on the number  
 576 of ventilators transferred from state  $s$  to state  $s'$  on day  $d$ ,  
 577 and on the number of ventilators allocated from the federal  
 578 government to state  $s$  on day  $d$ . We propose a bi-objective  
 579 formulation. The first objective is to minimize ventilator-day  
 580 shortages; for robustness, we consider both projected shortages  
 581 (based on demand forecasts) and worst-case shortages (including  
 582 a buffer in the demand estimates). The second objective  
 583 is to minimize inter-state transfers, to limit the operational  
 584 and political costs of inter-state coordination. Mixed-integer  
 585 optimization provides modeling flexibility to capture spatial-  
 586 temporal dynamics and the trade-offs between these various  
 587 objectives. We report the mathematical formulation of the  
 588 model, along with the key assumptions, in the appendix.

589 **B. Results.** We implemented the model on April 15, a time of  
 590 pressing ventilator need in the United States. We estimate  
 591 the number of hospitalizations from DELPHI-pred as the sum



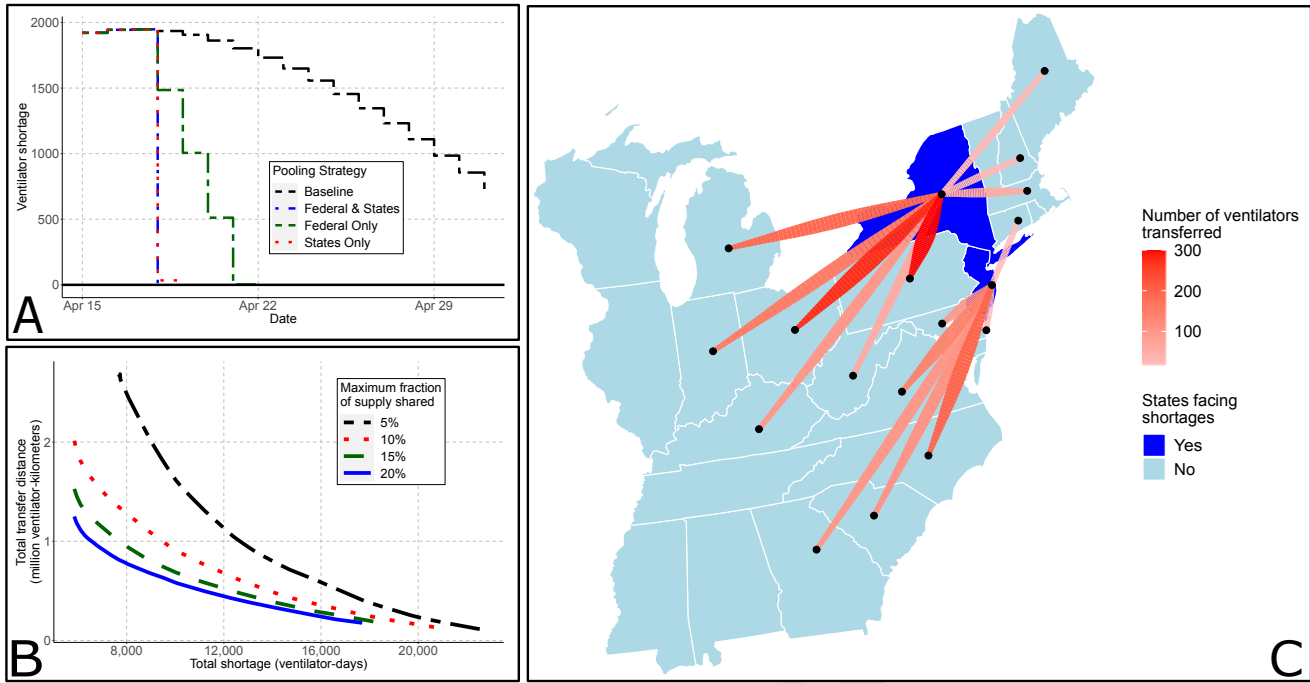

**Fig. 5.** The edge of optimization to eliminate ventilator shortages. (A) Projected shortages (in ventilator-days) in a baseline setting (without transfers) and with optimized transfers between the states and/or from the federal government. (B) Pareto frontier between transfer distance and total shortage, for different state pooling fractions. (C) Map of inter-state transfers recommended on April 15 in the US Northeast. For clarity, we do not plot shortages of fewer than 5 ventilators and transfers of fewer than 10.

of  $DH_R$  and  $DH_D$ . From our clinical outcomes database in Section 1, we estimate that 25% of hospitalized patients are put on a ventilator, which we use to estimate the demand for ventilators. We also obtain the average length of stay from our clinical outcomes database (Figure 2).

Figure 5A shows the evolution of ventilator shortages with and without ventilator transfers from the federal government and inter-state transfers. These results indicate that ventilator pooling can rapidly eliminate all ventilator shortages. Figure 5C shows ventilator transfers recommended in the US Northeast on April 15 (with inter-state transfers only), overlaid on a map displaying the predicted shortage without transfers.

There are different pathways toward eliminating ventilator shortages. Figure 5B shows the trade-off between shortages and transfer distance—each line corresponds to the maximal fraction of its own ventilators that each state can pool. Overall, states do not have to share more than 10% of their supply at any time to efficiently eliminate shortages. States can largely meet their needs with help from neighboring states, with cross-country transfers only used as a last resort. Broadly, results underscore trade-offs between ventilator shortages, the extent of inter-state transfers, the number of ventilators allocated from the federal government, and the robustness of the solution. We discuss these trade-offs further in the appendix.

**C. Discussion and Impact.** Our main insight is that ventilator shortages could be eliminated altogether through inter-state transfers and strategic management of the federal supply. Results also underscore (i) the benefits of inter-state coordination and (ii) the benefits of early coordination. First, ventilator shortages can be eliminated through inter-state transfers alone: leveraging a surge supply from the federal government is not required, though it may reduce inter-state transfers. Under our

recommendation, the most pronounced transfers occur from states facing no shortages (Ohio, Pennsylvania, and North Carolina) to states facing strong shortages (New York, New Jersey). Second, most transfers occur in early stages of the pandemic. This underscores the benefits of leveraging a predictive model like DELPHI-pred to align the ventilator supply with demand projections as early as possible.

A similar model has been developed to support the redistribution of ventilators across hospitals within the Hartford HealthCare system in Connecticut—using county-level forecasts of ventilator demand obtained from DELPHI-pred. This model has been used by a collection of hospitals in the United States to align ventilator supply with projected demand at a time where the pandemic was on the rise.

Looking ahead, the proposed model can support the allocation of critical resources in the next phases of the pandemic—spanning ventilators, medicines, personal protective equipment etc. Since epidemics do not peak in each state at the same time, states whose infection peak has already passed or lies weeks ahead can help other states facing immediate shortages at little costs to their constituents. Inter-state transfers of ventilators occurred in isolated fashion through April 2020; our model proposes an automated decision-making tool to support these decisions systematically. As our results show, proactive coordination and resource pooling can significantly reduce shortages—thus increasing the number of patients that can be treated without resorting to extreme clinical recourse with side effects (such as splitting ventilators).

## 5. Conclusion

This paper proposes a comprehensive data-driven approach to address several core challenges faced by healthcare providers

655 and policy makers in the midst of the COVID-19 pandemic.  
 656 We have gathered and aggregated data from hundreds of clinical  
 657 studies, electronic health records, and census reports. We  
 658 have developed descriptive, predictive and prescriptive models,  
 659 combining methods from machine learning, epidemiology,  
 660 and mixed-integer optimization. Results provide insights on  
 661 the clinical aspects of the disease, on patients' infection and  
 662 mortality risks, on the dynamics of the pandemic, and on the  
 663 levers that policy makers and healthcare providers can use  
 664 to alleviate its toll. The models developed in this paper also  
 665 yield decision support tools that have been deployed on our  
 666 dedicated website and that are actively being used by several  
 667 hospitals, companies and policy makers.

## 668 Acknowledgments

669 We would like to thank Dr. Barry Stein, Dr. Ajay Kumar,  
 670 Dr. Rocco Orlando, and Michelle Schneider from the Hartford  
 671 HealthCare system, Dr. Angelo Pan, Dr. Rosario Canino,  
 672 Sophie Testa and Federica Pezzetti from ASST Cremona, and  
 673 HM Hospitals for discussions and data, as well as Hari Bandi,  
 674 Katherine Bobroske, Martina Dal Bello, Mohammad Fazel-  
 675 Zarandi, Alvaro Fernandez Galiana, Samuel Gilmour, Adam  
 676 Kim, Zhen Lin, Liangyuan Na, Matthew Sobiesk, Yuchen  
 677 Wang and Sophia Xing from our extended team for helpful  
 678 discussions.

679 1. G Kampf, D Todt, S Pfaender, E Steinmann, Persistence of coronaviruses on inanimate surfaces and its inactivation with biocidal agents. *J. Hosp. Infect.* (2020).  
 680  
 681 2. S Sanchez1, et al., High Contagiousness and Rapid Spread of Severe Acute Respiratory Syndrome Coronavirus 2. *Emerg. Infect. Dis.* **27** (2020).  
 682  
 683 3. John Hopkins University, Center for Systems Science and Engineering (<https://systems.jhu.edu/research/public-health/ncov/>) (2020).  
 684  
 685 4. RM Anderson, H Heesterbeek, D Klinkenberg, TD Hollingsworth, How will country-based mitigation measures influence the course of the covid-19 epidemic? *The Lancet* **395**, 931–934 (2020).  
 686  
 687 5. N Fernandes, Economic effects of coronavirus outbreak (covid-19) on the world economy. Available at SSRN 3557504 (2020).  
 688  
 689 6. WJ McKibbin, R Fernando, The global macroeconomic impacts of covid-19: Seven scenarios. *CAMA Work. Pap.* (2020).  
 690  
 691 7. US Center for Disease Control, COVID-19 Forecasts (<https://www.cdc.gov/coronavirus/2019-ncov/covid-data/forecasting-us.html>) (2020).  
 692  
 693 8. US Center for Disease Control, Symptoms of Coronavirus (<https://www.cdc.gov/coronavirus/2019-ncov/symptoms-testing/symptoms.html>) (2020) (Accessed 11 May 2020).  
 694  
 695 9. World Health Organization, Coronavirus (<https://www.who.int/health-topics/coronavirus>) (2020) (Accessed 11 May 2020).  
 696  
 697 10. National Health Service, Check if you have Coronavirus symptoms (<https://www.nhs.uk/conditions/coronavirus-covid-19/check-if-you-have-coronavirus-symptoms>) (2020) (Accessed 11 May 2020).  
 698  
 699 11. Wj Guan, et al., Clinical characteristics of coronavirus disease 2019 in china. *New Engl. journal medicine* **382**, 1708–1720 (2020).  
 700  
 701 12. P Goyal, et al., Clinical characteristics of Covid-19 in New York City. *New Engl. J. Medicine* (2020).  
 702  
 703 13. CM Petrilli, et al., Factors associated with hospitalization and critical illness among 4,103 patients with covid-19 disease in new york city. *medRxiv* (2020).  
 704  
 705 14. P Forster, L Forster, C Renfrew, M Forster, Phylogenetic network analysis of SARS-CoV-2 genomes. *Proc. Natl. Acad. Sci.* **117**, 9241–9243 (2020).  
 706  
 707 15. LA Holland, et al., An 81 nucleotide deletion in SARS-CoV-2 ORF7a identified from sentinel surveillance in Arizona (Jan-Mar 2020). *J. Virol.* (2020).  
 708  
 709 16. S Garg, Hospitalization rates and characteristics of patients hospitalized with laboratory-confirmed coronavirus disease 2019—covid-net, 14 states, march 1–30, 2020. *MMWR. Morb. Mortal. Wkly. Rep.* **69** (2020).  
 710  
 711 17. FS Vahidy, et al., Racial and ethnic disparities in sars-cov-2 pandemic: Analysis of a covid-19 observational registry for a diverse us metropolitan population. *medRxiv* (2020).  
 712  
 713 18. D Bertsimas, et al., Covid-19 Mortality Risk Assessment: An international multi-center study. (2020) submitted for publication.  
 714  
 715 19. L Lan, et al., Positive RT-PCR test results in patients recovered from COVID-19. *Jama* **323**, 1502–1503 (2020).  
 716  
 717 20. O Troyanskaya, et al., Missing value estimation methods for dna microarrays. *Bioinformatics* **17**, 520–525 (2001).  
 718  
 719 21. T Chen, C Guestrin, Xgboost: A scalable tree boosting system in *Proceedings of the 22nd acm sigkdd international conference on knowledge discovery and data mining*. pp. 785–794 (2016).  
 720  
 721 22. SM Lundberg, SI Lee, A unified approach to interpreting model predictions in *Advances in*

*Neural Information Processing Systems 30*, eds. I Guyon, et al. (Curran Associates, Inc.), pp. 4765–4774 (2017). 727  
 728  
 729 23. SM Lundberg, et al., From local explanations to global understanding with explainable AI for trees. *Nat. Mach. Intell.* **2**, 2522–5839 (2020). 730  
 731  
 732 24. Y Wang, Y Wang, Y Chen, Q Qin, Unique epidemiological and clinical features of the emerging 2019 novel coronavirus pneumonia (covid-19) implicate special control measures. *J. medical virology* **92**, 568–576 (2020). 733  
 734  
 735 25. TP Velavan, CG Meyer, The covid-19 epidemic. *Trop. medicine & international health* **25**, 278 (2020). 736  
 737  
 738 26. D Caruso, et al., Chest ct features of covid-19 in rome, italy. *Radiology*, 201237 (2020). 739  
 740  
 741 27. C Huang, et al., Clinical features of patients infected with 2019 novel coronavirus in Wuhan, China. *The Lancet* **395**, 497–506 (2020). 742  
 743  
 744 28. W Ling, C-reactive protein levels in the early stage of COVID-19. *Med. et Maladies Infect.* (2020). 745  
 746  
 747 29. Y Shi, et al., COVID-19 infection: the perspectives on immune responses (2020). 748  
 749  
 750 30. Q Shi, et al., Serum calcium as a biomarker of clinical severity and prognosis in patients with coronavirus disease 2019: a retrospective cross-sectional study. *Critical Care Emerg. Medicine* (2020). 751  
 752  
 753 31. RE Jordan, P Adab, K Cheng, Covid-19: risk factors for severe disease and death (2020). 754  
 755  
 756 32. Y Liu, et al., Neutrophil-to-lymphocyte ratio as an independent risk factor for mortality in hospitalized patients with covid-19. *J. Infect.* (2020). 757  
 758  
 759 33. F Zhou, et al., Clinical course and risk factors for mortality of adult inpatients with covid-19 in wuhan, china: a retrospective cohort study. *The Lancet* (2020). 760  
 761  
 762 34. ML Li, et al., Forecasting COVID-19 and Analyzing the Effect of Government Interventions. (2020) submitted for publication. 763  
 764  
 765 35. SM Kissler, C Tedijanto, E Goldstein, YH Grad, M Lipsitch, Projecting the transmission dynamics of sars-cov-2 through the postpandemic period. *Science* (2020). 766  
 767  
 768 36. New York Times, Coronavirus in the U.S.: Latest Map and Case Count (<https://www.nytimes.com/interactive/2020/us/coronavirus-us-cases.html>) (2020). 769  
 770  
 771 37. L Breiman, J Friedman, CJ Stone, RA Olshen, *Classification and regression trees*. (CRC press), (1984). 772  
 773  
 774 38. RA Cornejo, et al., Effects of prone positioning on lung protection in patients with acute respiratory distress syndrome. *Am. journal respiratory critical care medicine* **188**, 440–448 (2013). 775  
 776  
 777 39. T Bein, et al., The standard of care of patients with ARDS: ventilatory settings and rescue therapies for refractory hypoxemia. *Intensive care medicine* **42**, 699–711 (2016). 778  
 779  
 780 40. L Meng, et al., Intubation and Ventilation amid the COVID-19 Outbreak Wuhan's Experience. *Anesthesiol. The J. Am. Soc. Anesthesiol.* (2020). 781  
 782  
 783 41. ML Ranney, V Griffith, AK Jha, Critical supply shortages—the need for ventilators and personal protective equipment during the Covid-19 pandemic. *New Engl. J. Medicine* (2020). 784  
 785  
 786 42. HC Huang, et al., Stockpiling ventilators for influenza pandemics. *Emerg. infectious diseases* **23**, 914 (2017). 787  
 788  
 789 43. S Mehrotra, H Rahimian, M Barah, F Luo, K Schantz, A model of supply-chain decisions for resource sharing with an application to ventilator allocation to combat COVID-19. *Nav. Res. Logist. (NRL)* (2020). 790  
 791  
 792

1

## 2 **Supplementary Information for**

### 3 **From predictions to prescriptions: A data-driven response to COVID-19**

4 **Dimitris Bertsimas, Leonard Boussioux, Ryan Cory-Wright, Arthur Delarue, Vassilis Digalakis, Alexandre Jacquillat,**  
5 **Driss Lahlou Kitane, Galit Lukin, Michael Li, Luca Mingardi, Omid Nohadani, Agni Orfanoudaki, Theodore Papalexopoulos,**  
6 **Ivan Paskov, Jean Pauphilet, Omar Skali Lami, Bartolomeo Stellato, Hamza Tazi Bouardi, Kimberly Villalobos Carballo,**  
7 **Holly Wiberg and Cynthia Zeng**

8 **Dimitris Bertsimas.**  
9 **E-mail: [dbertsim@mit.edu](mailto:dbertsim@mit.edu)**

#### 10 **This PDF file includes:**

- 11     Supplementary text
- 12     Figs. S1 to S7
- 13     Tables S1 to S6
- 14     SI References

## 15 Supporting Information Text

### 16 1. Supplementary Materials on Clinical Outcomes Database

17 The clinical outcomes database analyzed in Section 1 aggregates reported data from different hospitals across the world. These hospitals  
18 may have different equipment and reporting standards. It was obtained through a human reading process, which is inherently imperfect. For  
19 this reason, we now list some important observations and caveats about the database, and refer the reader to our website for a complete list  
20 of the 160 papers entered into the database.\*

- 21 • To minimize human error in data reporting, we have verified some key features with additional scrutiny, including mortality, ICU  
22 and hospital length of stay, key symptoms (fever, cough, short breath, fatigue, diarrhea) and common comorbidities (hypertension,  
23 diabetes).
- 24 • Across papers, subcohort divisions may follow different criteria, including: severity of disease (severe vs. mild), mortality (survivors vs.  
25 non-survivors), treatment (intubation vs. non-intubation), comorbidity (diabetic vs. non-diabetic). To retain a large enough number of  
26 studies in each category, we classify a population as “mild” if the study classifies it as “not asymptomatic” and “mild”, “general”, or  
27 “non-ICU” and not “severe/critical”; and we classify a population as “severe” if the study classifies it as “severe”, “critical”, “ICU only”  
28 or “non-survivors only”.
- 29 • Studies in this dataset do not always have the same purpose. For instance, many papers from Italy seem to report data only on  
30 non-survivors. In addition, some studies focus on the disease’s contagion profile, with little information on mortality, discharge, stay  
31 length. Data points from these studies may exhibit a high proportion of missing features.
- 32 • We have tried to report all lab values in consistent units. We have included a companion document (Reference Ranges) with  
33 corresponding reference ranges to facilitate analysis. There are some instances where the reported lab units seem inconsistent with  
34 the expected ranges (e.g. for D-Dimer), but we have generally reported the raw values from the source papers.
- 35 • The papers entered in the database do not consistently report confidence intervals alongside population means. For this reason, we  
36 have declined to provide confidence intervals for the quantities estimated in this part of the paper.
- 37 • We intend to continuously update the database as new papers become available. For this reason, the average values reported in this  
38 paper may change as more data becomes available.

39 Table S1 reports comorbidities, demographics, average lab values and average clinical outcomes among all patients, mild patients and  
40 severe patients. This expands Table 2 of the paper by including the number of reported cases in each category.

41 Finally, Table S2 reports statistics on treatments in different continents. The data are reported at a higher level of granularity in early  
42 studies in Asia, which hinders direct comparisons. Still, we observe significant differences in the use of hydroxychloroquine and ventilation  
43 between Asia, Europe and North America.

### 44 2. Supplementary Materials on Clinical Risk Calculators

45 **A. Clinical Characteristics of Study Population.** Our mortality cohort comprises 2,859 patients, 739 (25.8%) of whom deceased during  
46 hospitalization. The cohort includes patients from both ASST Cremona and HM Hospitals. Table S3 summarizes the clinical characteristics  
47 of the cohort, both in aggregate and broken down by survival status. The reported features are those used in the final model, that is age,  
48 gender, 3 vitals values, 13 lab results, and 4 comorbidities.

49 Our infection cohort comprises 3,135 patients, 1,661 (53.0%) of whom tested positive for COVID-19. This cohort only includes patients  
50 from ASST Cremona, as negative tests results were not available from HM Hospitals. Table S4 summarizes the clinical characteristics of the  
51 cohort, both in aggregate and broken down by test result. Again, the reported features are those used in the final model, that is age, gender,  
52 4 vitals values, and 14 lab values.

53 **B. Method Details.** We construct the feature space by aggregating all clinical features for each of the cohorts. We restricted the features  
54 to those that have at most 40% of missing values in both datasets (ASST Cremona and HM Hospitals). Missing values are imputed using  
55  $k$ -nearest neighbors imputation method (1). The mortality model consists of 22 features. The infection model has a larger feature space,  
56 since we are not limited to common features in both datasets. We restrict this model to the 20 most important features, as determined by the  
57 algorithm, to ensure usability and reduce the data entry burden on end-users.

58 We train models for each of the two outcomes of interest (mortality and infection), both including and excluding lab values. This results  
59 in a total of four models, referred to as “mortality with lab”, “mortality without lab”, “infection with lab”, and “infection without lab”. We  
60 use the XGBoost algorithm to train all models (2). We leverage a Bayesian optimization framework to select the best model parameters,  
61 using the mean cross-validation area under the curve (AUC) across 40 random seeds as the loss function. This technique results in a more  
62 accurate tuning compared to standard grid search, yielding better performance on the test set. We use Scikit-learn (3) to interface XGBoost  
63 and Scikit-optimize (4) to perform the hyperparameter tuning. We tune the following parameters for every model: learning rate,  $\gamma$ ,  $\lambda$ ,  $\alpha$ ,  
64 minimum child weight, maximum tree depth, number of estimators, and the subsample ratio of columns when constructing each tree. All  
65 remaining hyperparameters are set to their default value.

\*<https://www.covidanalytics.io/dataset>



**C. Performance Evaluation.** Figure S1a reports the average receiver operating curve and precision-recall curve for each model. The results are averaged across models generated from 40 random seeds. The mortality models have higher average AUCs than the infection models, although the infection models are stronger when evaluated on precision and recall. As expected, predictive performance deteriorates when lab values are excluded. Yet, the models without lab values still achieve strong performance. In particular, the AUC of mortality model drops only moderately when lab values are excluded. Both models see a similar loss in precision/recall when lab values are excluded.

Table S5 reports threshold-based metrics, which evaluate the discriminative ability of the calculators at a fixed cutoff. We ensure a sensitivity of at least 90% to reflect the high cost of false negatives (missing a death or an infection). We select the highest corresponding threshold to maximize specificity. The results show that the accuracy of the models spans 65%–80%. The mortality calculator with lab values achieves a specificity of 76%. The infection model with lab values has lower specificity (63%), but better precision (74% vs. 56%).

Finally, Figure S2 displays calibration plots, showing the true event rates as a function of the average predicted probabilities. The x-axis bins the population by average predicted risk, and the y-axis plots the true event rate (percentage of deaths or infection). All four risk calculators are well calibrated across subgroups, as the fits are close to the 45-degree line. The bottom plot shows the distribution of predicted risk values from the models. For the mortality calculators, the mean predicted values fall below 10% for most samples, whereas the infection calculators distribute the risk more evenly across the cohort. This reflects the fact that mortality is less prevalent than infection.

### 3. Supplementary Materials on DELPHI-pred and DELPHI-presc

#### A. Formulation of DELPHI-pred.

**A.1. General Formulation.** The DELPHI model separates people into 11 possible states:

- **Susceptible ( $S$ ):** People who have not been infected.
- **Exposed ( $E$ ):** People currently infected, but not contagious and within the incubation period.
- **Infected ( $I$ ):** People currently infected and contagious.
- **Undetected ( $U_R$ ) & ( $U_D$ ):** People infected and self-quarantined due to the effects of the disease, but not confirmed due to lack of testing. Some of these people recover ( $U_R$ ) and some die ( $U_D$ ).
- **Detected, Hospitalized ( $DH_R$ ) & ( $DH_D$ ):** People who are infected, confirmed, and hospitalized. Some of these people recover ( $DH_R$ ) and some die ( $DH_D$ ).
- **Detected, Quarantine ( $DQ_R$ ) & ( $DQ_D$ ):** People who are infected, confirmed, and home-quarantined rather than hospitalized. Some of these people recover ( $DQ_R$ ) and some die ( $DQ_D$ ).
- **Recovered ( $R$ ):** People who have recovered from the disease (and immune).
- **Deceased ( $D$ ):** People who have deceased from the disease.

In addition to main functional states, we introduce helper states to calculate a few useful quantities: Total Hospitalized (TH), Total Detected Deceased (DD) and Total Detected Cases (DT). The full mathematical formulation of the model is as follows:

$$\begin{aligned}
\frac{dS}{dt} &= -\tilde{\alpha}\gamma(t)S(t)I(t) \\
\frac{dE}{dt} &= \tilde{\alpha}\gamma(t)S(t)I(t) \\
\frac{dI}{dt} &= r_i E(t) - r_d I(t) \\
\frac{dU_R}{dt} &= r_d(1 - \tilde{p}_{dth})(1 - p_d)I(t) - r_{ri}U_R(t) \\
\frac{dDH_R}{dt} &= r_d(1 - \tilde{p}_{dth})p_d p_h I(t) - r_{rh}DH_R(t) \\
\frac{dDQ_R}{dt} &= r_d(1 - \tilde{p}_{dth})p_d(1 - p_h)I(t) - r_{ri}DQ_R(t) \\
\frac{dU_D}{dt} &= r_d \tilde{p}_{dth}(1 - p_d)I(t) - \tilde{r}_{dth}U_D(t) \\
\frac{dDH_D}{dt} &= r_d \tilde{p}_{dth}p_d p_h I(t) - \tilde{r}_{dth}DH_D(t) \\
\frac{dDQ_D}{dt} &= r_d \tilde{p}_{dth}p_d(1 - p_h)I(t) - \tilde{r}_{dth}DQ_D(t) \\
\frac{dTH}{dt} &= r_d p_d p_h I(t) \\
\frac{dDD}{dt} &= \tilde{r}_{dth}(DH_D(t) + DQ_D(t)) \\
\frac{dDT}{dt} &= r_d p_d I(t) \\
\frac{dR}{dt} &= r_{ri}(U_R(t) + DQ_R(t)) + r_{rh}DH_R(t) \\
\frac{dD}{dt} &= \tilde{r}_{dth}(U_D(t) + DQ_D(t) + DH_D(t))
\end{aligned}$$

This set of differential equations comprises 11 explicit parameters, defined below. The parameters with a tilde are the parameters that are fitted against historical data for each state; the others are fixed parameters that we estimate using our clinical outcomes database (Section 1).

- $\tilde{\alpha}$  is the baseline infection rate, constant across all US states.
- $\gamma(t)$  measures the government response and is defined as:

$$\gamma(t) = \frac{2}{\pi} \arctan \left( \frac{-(t - \tilde{t}_0)}{\tilde{k}} \right) + 1,$$

where the parameters  $\tilde{t}_0$  and  $\tilde{k}$  capture, respectively, the start date and the strength of the response.

- $r_d$  is the rate of detection. This equals to  $\frac{\log 2}{T_d}$ , where  $T_d$  is the median time to detection (2 days).
- $r_i$  is the rate of infection leaving incubation phase. This equals to  $\frac{\log 2}{T_i}$ , where  $T_i$  is the median time to leave incubation (5 days).
- $r_{ri}$  is the rate of recovery not under hospitalization. This equals to  $\frac{\log 2}{T_{ri}}$ , where  $T_{ri}$  is the median time to recovery when a patient is not under hospitalization (10 days).
- $r_{rh}$  is the rate of recovery under hospitalization. This equals to  $\frac{\log 2}{T_{rh}}$ , where  $T_{rh}$  is the median time to recovery under hospitalization (15 days).
- $\tilde{r}_{dth}$  is the rate of death.
- $\tilde{p}_{dth}$  is the mortality rate.
- $p_d$  is the percentage of infection cases detected. This percentage is constant and is set to 20%.
- $p_h$  is the percentage of detected cases hospitalized. This percentage is also constant and set to 15%.

Therefore, we fit on 5 parameters from the list above ( $\tilde{\alpha}, \tilde{p}_{dth}, \tilde{r}_{dth}, \tilde{t}_0, \tilde{k}$ ). In addition, we create two additional parameters  $\tilde{k}_1, \tilde{k}_2$  to account for the initial population in the infected ( $I$ ) and exposed ( $E$ ) states. We thus fit seven parameters per state.

The parameters are fitted using non-convex optimization methods, including trust-region methods (5) and the Nelder-Mead method (6). We use historical counts of cases and deaths for the fitting procedure. We use a weighted Mean Squared Error (MSE) metric to account for recency and different types of data. The weighted MSE for a training period of  $T$  days is defined as:

$$\begin{aligned} \text{Weighted MSE} = & \sum_{t=1}^T t \cdot (DT(t) - \text{Total Detected Cases on Day } t)^2 \\ & + \lambda^2 \cdot \sum_{t=1}^T t \cdot (DD(t) - \text{Total Detected Deceased on Day } t)^2. \end{aligned}$$

The factor  $t$  gives more prominence to more recent data, as recent errors are more likely to propagate into future errors. We set  $\lambda = \min \left\{ \frac{\text{Total Detected Cases on Day } T}{3 \cdot \text{Total Detected Deceased on Day } T}, 10 \right\}$  to balance the fitting between cases and deaths.

**A.2. Modeling Government Response.** As governments respond to the spread of the epidemic, the rate of infection decreases. We model this by multiplying an initial infection rate with an inverse tangent function, which captures three phases of government response (Figure S3).

- **Phase I:** This phase models the initial response when the government has just started to consider implementing policies. Some people have already changed their behavior in response to early reports, but most people continue business-as-usual activities.
- **Phase II:** This phase is characterized by the sharp decline in infection rate as policies get broadly implemented.
- **Phase III:** This phase reflects the diminishing marginal returns in the decline of the infection rate as the measures reach saturation.

Using parameters  $\tilde{t}_0$  and  $\tilde{k}$ , we control the start time and the strength of the measures. We can therefore interpret  $\tilde{t}_0$  as the median day of action, and  $\tilde{k}$  as the median rate of action. This formulation allows us to model, under the same framework, a wide variety of policies—spanning school closures, restriction on mass gatherings, stay-at-home policies, etc.

**A.3. DELPHI-pred Validation.** Figure S4 shows the projected number of deaths in the United States, with projections made on three different weeks, against historical observations. This complements the corresponding figure in the main text reporting the number of projected vs. actual cases. We see that we were generally able to predict the number of deaths up to 4 weeks ahead with good accuracy. One exception is our prediction made on April 3, which is due to a lack of state-level data on deaths at the time (hence, we had to assume a constant mortality rate per state). But after that, our projections have closely followed historical trends.

## B. Formulation of DELPHI-pres.

**B.1. Modeling of the Impact of Government Response.** Recall that we fit a machine learning model to predict the value of  $\gamma(t)$  (fitted by DELPHI-pred), as a function of the policies in place. The objective is to evaluate the impact of each policy on the infection rate in order to simulate its overall effect on the dynamics of the pandemic. Figure S5 shows the resulting regression tree, using state-level data in the United States. The results show that more stringent policies result in lower values of  $\gamma(t)$ , hence in lower infection rates. For instance, in states with no measure in place, the predicted value of  $\gamma(t)$  is 1.304; in states where a stay-at-home policy is in place, the predicted value of  $\gamma(t)$  is 0.312; in states where partial social distancing policies are in place, the predicted value of  $\gamma(t)$  falls in between.

The main objective of DELPHI-presc is to modify the value of  $\gamma(t)$  in DELPHI-pred to account for future changes in social distancing policies, using the values predicted by the tree shown in Figure S5. To this end, we define the following quantities:

- $t_c$  is the time of the policy change.

- $k_0$  is a *normalized* pair-wise difference between the predicted values of  $\gamma(t)$  between policies (with respect to the largest predicted value of  $\gamma(t)$  under no measure). For instance, transitioning from stay-at-home to no measure induces an offset  $(1.304 - 0.312)/1.304 = +0.761$ . All values can be found in Table S6—the offset is positive if the new policy is more lenient, and negative if it is more stringent.
- $p_0$  is the normalized value of the current policy.

We then correct the government response as follows:

$$\gamma'(t) = \max \left\{ \frac{2}{\pi} \arctan \left( -\frac{t - \tilde{t}_0}{k} \right) + 1 + k_0 \cdot \min \left[ \frac{2 - \gamma(t_c)}{1 - p_0}, \frac{\gamma(t_c)}{p_0} \right], 0 \right\}, \quad \forall t \geq t_c.$$

For example, if we are currently in Lockdown and are moving to No measure, then we obtain  $k_0 = 0.787$ ,  $p_0 = 0.329/1.544 = 0.213$  and

$$\gamma(t_c) = \frac{2}{\pi} \arctan \left( -\frac{t_c - \tilde{t}_0}{k} \right) + 1.$$

**B.2. Application to Policy Assessment.** To assess any policy, we run the DELPHI-pred model (governed by the system of differential equations), using the value of the infection rate derived in Section Eq. (B.1). We report the impact of the different policies on the case count in the main body of the paper. Figure S6 provides a similar visualization of the effect on the death count in the state of New York. We can draw similar observations regarding the impact of the various policies and the impact of the timing of these policies.

#### 4. Supplementary Materials on Ventilator Allocation

We now detail the formulation of the optimization model proposed for ventilator allocation. We begin by specifying the model mathematically, then discuss data sources and parameter calibration.

**A. Formulation.** We consider  $S$  states, indexed by  $s = 1, \dots, S$ , and  $D$  days, indexed by  $d = 1, \dots, D$ .

**Data.** In formulating the problem, we consider the following data as given:

- $v_{s,d}$  is the demand for ventilators in state  $s$  on day  $d$ .
- $b_s$  is the base supply of ventilators starting in each state  $s$ .
- $n_d$  is the surge supply of ventilators distributed by the federal government on day  $d$ .
- $d_{s,s'}$  is the distance between state  $s$  and state  $s'$ .
- $\tau_{s,s'}$  is the lead time between state  $s$  and state  $s'$ .

We note two comments regarding these inputs. First, the surge supply  $n_d$  corresponds to the number of ventilators that are actually distributed by the federal government on day  $d$ : the details of managing the federal stockpile fall beyond the scope of this model. More generally,  $n_d$  represents supply available from any exogenous, centralized source. Second, we consider distances between states as a way to encourage transfers between neighboring states. We also calibrate the distances such that  $d_{s,s} > 0$  for each state  $s$ , to ensure we do not propose meaningless transfers from state  $s$  to itself.

**Decisions.** We define integer decision variables as follows:

- $x_{s,d} \in \mathbb{Z}^+$  is the supply of ventilators in state  $s$  on day  $d$ .
- $y_{s,s',d} \in \mathbb{Z}^+$  is the number of ventilators sent from state  $s$  to state  $s'$  on day  $d$ .
- $z_{s,d} \in \mathbb{Z}^+$  is the additional supply state  $s$  receives from the federal government on day  $d$ .
- $w_{s,d} \in \mathbb{Z}^+$  is the shortage of ventilators in state  $s$  on day  $d$  relative to the demand  $v_{s,d}$ .
- $\Delta_{s,d} \in \mathbb{Z}^+$  is the shortage of ventilators in state  $s$  on day  $d$  relative to the demand with a buffer.

**Parameters.** We define the following parameters, which control different policy trade-offs:

- $f_{\max} \in [0, 1]$  is the maximum fraction of its base supply that each state is willing to share. A value of  $f_{\max} = 0$  indicates that states are not willing to share any ventilator with other states; a value of  $f_{\max} = 1$  indicates that states are willing to share all their ventilator supply with other states.
- $\alpha \in [0, \infty)$  is the percentage of projected demand that states would like to plan for with a supply buffer. For example,  $\alpha = 0.1$  will penalize any solution such that supply falls within 10% of projected demand.
- $\lambda \in [0, \infty)$  is a regularization parameter that captures the trade-off between the financial and logistical cost of interstate transfers with the public health cost of ventilator shortages.
- $t_{\min} \in \mathbb{Z}^+$  is the number of days a ventilator is in use after it is shipped to a new location, allowing to control for excessive transfers.
- $\rho \in [0, 1]$  is a relative cost parameter capturing the relative importance of projected shortages vs. worst-case shortages. Each unit of supply that falls short of the projected demand is assigned a cost of 1. Each unit of supply that exceeds the demand but does not exceed the state's desired supply buffer is assigned a cost of  $\rho$ .

**Objective.** The problem of allocating scarce resources in a pandemic is complex because of the necessity to balance competing interests. We identify two key operational goals: improving public health outcomes, and reducing financial cost. We therefore formulate the ventilator allocation problem with two objectives, minimizing total shortage costs as well as total ventilator transfer costs. Each unit of ventilator shortage is assigned a weight of 1 (for shortage relative to the projected demand) or a weight of  $\rho \leq 1$  (for shortage relative to the buffered demand). We formalize the bi-objective problem by means of a penalty on transfers, weighted with a trade-off parameter  $\lambda$ .

$$\min \sum_{s=1}^S \sum_{d=1}^D (w_{s,d} + \rho \Delta_{s,d}) + \lambda \sum_{s=1}^S \sum_{s'=1}^S \sum_{d=1}^D d_{s,s'} y_{s,s',d}. \quad [1a]$$

Note that ventilators distributed by the federal government are not penalized, as our model simply treats this source as exogenous.

188 **Constraints.**

- 189 • Initial supply for each state  $s$ :

190 
$$x_{s,0} = b_s, \quad \forall s = 1, \dots, S. \quad [1b]$$

- 191 • The supply in each state  $s$  on each day  $d$  remains higher than the fraction of its initial supply the state wants to retain:

192 
$$x_{s,d} \geq (1 - f_{\max})b_s, \quad \forall s = 1, \dots, S, d = 1, \dots, D. \quad [1c]$$

- 193 • The transfers from the federal government cannot exceed the available surge supply on each day  $d$ :

194 
$$\sum_{s=1}^S z_{s,d} \leq n_d, \quad \forall d = 1, \dots, D. \quad [1d]$$

- 195 • The shortage variable corresponds to the positive part of the difference between ventilator demand and supply, if positive, for each state  $s$  and day  $d$ :

196 
$$w_{s,d} \geq v_{s,d} - x_{s,d}, \quad \forall s = 1, \dots, S, d = 1, \dots, D. \quad [1e]$$

- 197 • The buffer shortage variable is defined such that the total (actual plus buffer) shortage corresponds to the difference between buffered demand and ventilator supply, if positive, for each state  $s$  and day  $d$ :

198 
$$w_{s,d} + \Delta_{s,d} \geq (1 + \alpha)v_{s,d} - x_{s,d}, \quad \forall s = 1, \dots, S, d = 1, \dots, D. \quad [1f]$$

- 199 • (Conservation of flow) For each state  $s$  and day  $d$ , today's supply is equal to yesterday's supply plus what is received today from the government and the other states, minus what is sent to other states, with  $\tau_{s',s}$  reflecting shipments' lead times:

200 
$$x_{s,d} = x_{s,d-1} + z_{s,d} + \sum_{s'=1}^S y_{s',s,d-\tau_{s',s}} - \sum_{s'=1}^S y_{s,s',d}, \quad \forall s = 1, \dots, S, d = 1, \dots, D. \quad [1g]$$

- 201 • (Minimum days in use) For each state  $s$  and day  $d$ , any incoming ventilator, either from another state or from the federal government, cannot be shipped out for at least  $t_{\min}$  days. This constraint ensures that ventilators are not transferred too often.

202 
$$\sum_{d'=\max(1,d-t_{\min})}^{d-1} \left( z_{s,d'} + \sum_{s'=1}^S y_{s',s,d'} \right) \leq x_{s,d}, \quad \forall s = 1, \dots, S, d = 1, \dots, D. \quad [1h]$$

- 203 • Any state  $s$  facing a shortage on day  $d$  cannot ship any ventilators to other states on day  $d$ . To write this constraint, we define auxiliary binary variables  $a_{s,d} \in \{0, 1\}$  indicating if there is a shortage in state  $s$  on day  $d$  and a parameter  $V_{\max}$  providing a trivial upper bound on the number of ventilators a state can ship per day (we use a value of 3,000 which does not restrict the solution, as it exceeds the shortage faced by any state on any given day).

204 
$$w_{s,d} + \Delta_{s,d} \leq v_{s,d}(1 + \alpha)a_{s,d}, \quad [1i]$$

205 
$$\sum_{s'=1}^S y_{s,s',d} \leq V_{\max}(1 - a_{s,d}). \quad [1j]$$

207 **B. Data Sources and Parameter Calibration.** Our optimization model is complex enough to model high-level dynamics of scarce resource allocation, yet simple enough to only require simple data inputs. We now describe our methodology in collecting the key data necessary to solve this optimization problem.

210 **Demand.** The most important input data is the forecasted ventilator demand  $v_{s,d}$ . Consistent with our end-to-end data-driven approach, and in contrast with other ventilator allocation approaches (7), we develop our own demand forecasts using DELPHI-pred (Section 3 of the main text). Recall that DELPHI-pred does not only estimate the number of cases, but also the number of hospitalizations, equal to  $DH_R + DH_D$ . We then apply a 25% ratio to estimate the number of ventilators in use—given that, in our clinical outcomes database, 25% of hospitalized patients are on a ventilator. Ultimately, we can use the DELPHI-pred outputs to derive projections of ventilator demand at the state level and at the daily level—consistently with the optimization input  $v_{s,d}$ .

216 **Supply.** It can be difficult to estimate how many ventilators are available in each state as well as at the federal level. For the base supply  $b_s$ , we use inventory levels from a 2010 American Medical Association report (8). We adjust this number for population growth, under the assumption that the number of ventilators per capita has remained constant in each state.

217 Of course, ventilators can also be used to treat non-COVID-19 patients. We assume that 50% of ventilator supply across the board is unavailable due to non-COVID-19 usage, in line with other estimates (7).

218 In addition, our model takes into account the daily availability  $n_d$  of ventilators at the federal level. Estimating this quantity from publicly-available sources is both difficult due to limited data and politically fraught. We use the estimate from the Society for Critical Medicine that the federal stockpile contains at least 12,700 ventilators (9). Some news reports suggest a lower estimate of 10,000 based on some defects in the stockpiled equipment (10), while others suggest an estimate of 16,600 based on older model repairs (11). Based on these reference points, we estimate roughly 13,500 available ventilators and assume that they can be deployed evenly over a month. In other words, we allow 450 ventilators to be deployed each day for 30 days (starting on day 4 to allow for lead times). This gradual release reflects potential operational constraints and strategic considerations of controlling the release of inventory in case of unexpected outbreaks. Yet, given the underlying uncertainty, we perform sensitivity analysis to explore how the model's recommendation varies with the federal stockpile.



229 **Distances and lead times.** We compute the interstate distance  $d_{s,s'}$  as the Euclidean distance between the centers of states  $s$  and  $s'$ , and  
230 we let the lead time parameter  $\tau_{s,s'}$  equal 3 days for every pair of states. Our choice of a conservative uniform lead time for shipments is  
231 motivated by simplicity concerns. This could be improved, in future work, to better reflect efficiencies in the US shipping infrastructure.

#### 232 **Trade-off parameters.**

- 233 • Understanding the impact of states' willingness to share ventilators with other states is a key takeaway from our model. In Figure 7B,  
234 we vary the fraction  $f_{\max}$  of each state's pooling supply between  $\{0\%, 5\%, 10\%, 15\%, 20\%\}$ . Results indicate there is little additional  
235 efficiency to be gained from states sharing more than 20% of their supply.
  - 236 • Understanding the relative importance of federal surge supply compared to interstate transfers is another interesting takeaway from  
237 our model. In Figure 7A, we show the effects of removing federal surge supply, or preventing interstate transfers, on ventilator  
238 shortage reduction. We show more detailed sensitivity analysis results in Section C.
  - 239 • We vary the parameter  $\lambda$  to derive the the Pareto-optimal frontier of the trade-off between inter-state transfers vs. ventilator shortages  
240 (for instance in Fig. 7B). As  $\lambda$  tends to zero, transfers incur no cost other than rendering the ventilators unavailable during shipment;  
241 as  $\lambda$  tends to infinity, transfers become heavily discouraged.
  - 242 • The parameter  $\alpha$  models uncertainty in the demand forecast as well as robustness to inefficiency in ventilator allocation within each  
243 state. We vary the percentage  $\alpha$  of buffered demand within  $\{0\%, 5\%, 10\%, 20\%\}$  in Section C.
- 244 Finally, we choose the following values for the remaining two parameters, which have a small impact on the final solution.
- 245 • We set the value of  $t_{\min}$  to 10 days, based on the clinical outcomes database (Section 1).
  - 246 • We set  $\rho$ , the cost of shortage with respect to buffered demand relative to the cost of shortage with respect to real demand, to 0.25.

247 **C. Sensitivity analysis.** In the main text, we discuss the impact of the federal surge and inter-state coordination on alleviating ventilator  
248 shortages, showing that ventilator shortages can be eliminated through limited transfers among states and from the federal government. The  
249 results also suggest trade-offs between the number of inter-state transfers, the amount of ventilator shortages, and the fraction of ventilators  
250 that each state is willing to share (captured by the  $f_{\max}$  parameter). We report additional results to underscore the trade-offs between  
251 inter-state transfers, the ventilator supply from the federal government, and the robustness of the solution—that is, the exposure of the  
252 states to ventilator shortages if demand exceeds our projections.

253 To this end, Figure S7 shows the Pareto-optimal frontier between the model's two objectives, inter-state transfer distance and ventilator  
254 shortage, as a function of two model parameters:  $\alpha$  (capturing the demand buffer that states would like to plan for) and a *surge supply*  
255 *multiplier* (capturing by how much the federal government's ventilator supply varies from our estimates). Note that the buffer  $\alpha$  does not  
256 impact the number of inter-state transfers and the amount of ventilator shortages too significantly—suggesting that the solution can be made  
257 robust at limited overall costs. In contrast, as the surge supply is decreased, the number of required ventilator transfers and the amount of  
258 ventilator shortages increase—highlighting the need for stronger cooperation between states as federal supply drops.

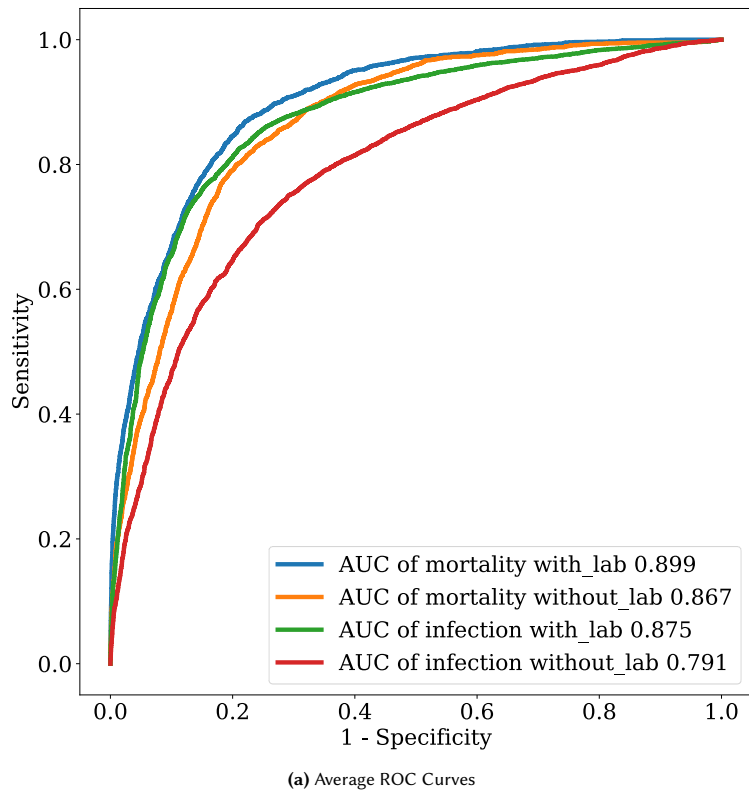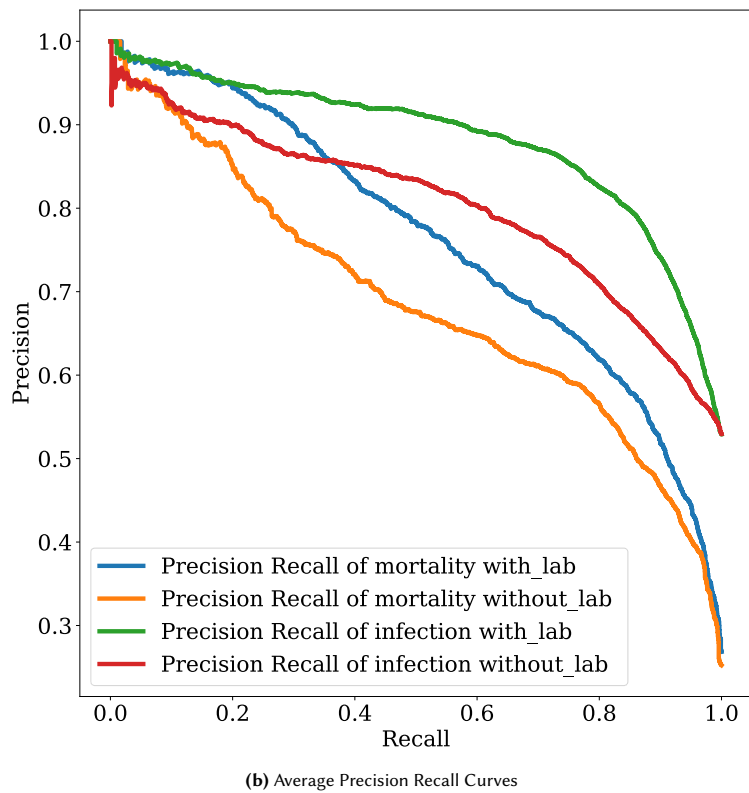

Fig. S1. Bootstrapped results on ROC and Precision Recall curves for all calculators on the testing set.

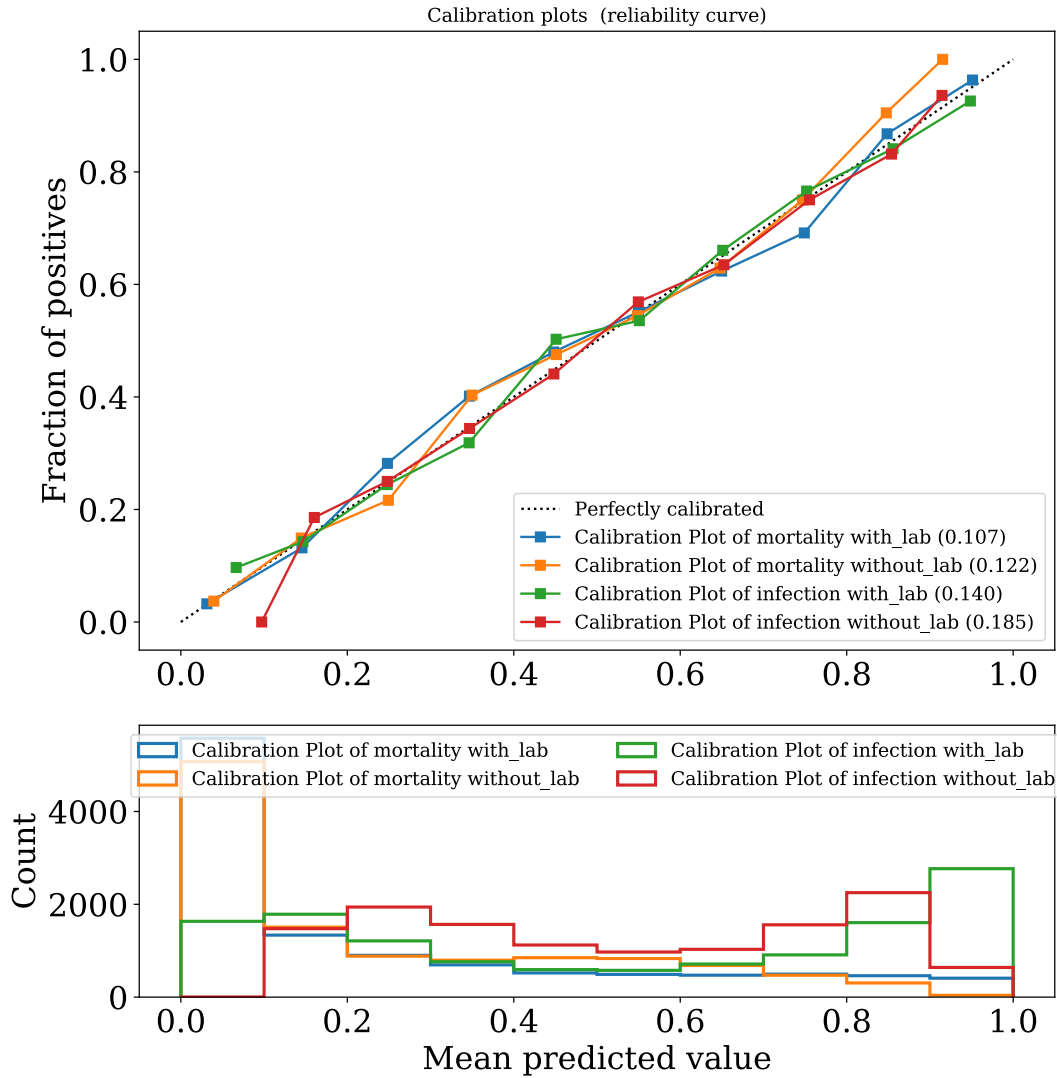

Fig. S2. Bootstrapped Results on the Calibration Curves for both risk calculators on the testing set. The intervals are: [0,10%], (10,20%], (20,30%], ..., (90,100%]. The event rates are plotted against the bin mid-points. An ideal event rate is marked by the dotted 45 degree line.

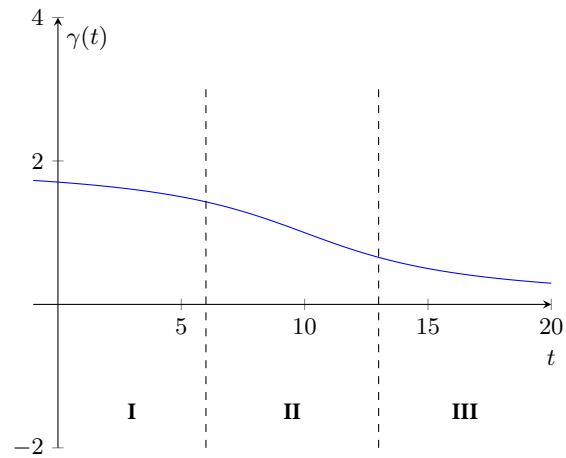

Fig. S3. Illustration of  $\gamma(t) = \frac{2}{\pi} \arctan\left(-\frac{t-10}{5}\right) + 1$  (i.e.,  $\tilde{t}_0 = 10$  and  $k = 5$ ).



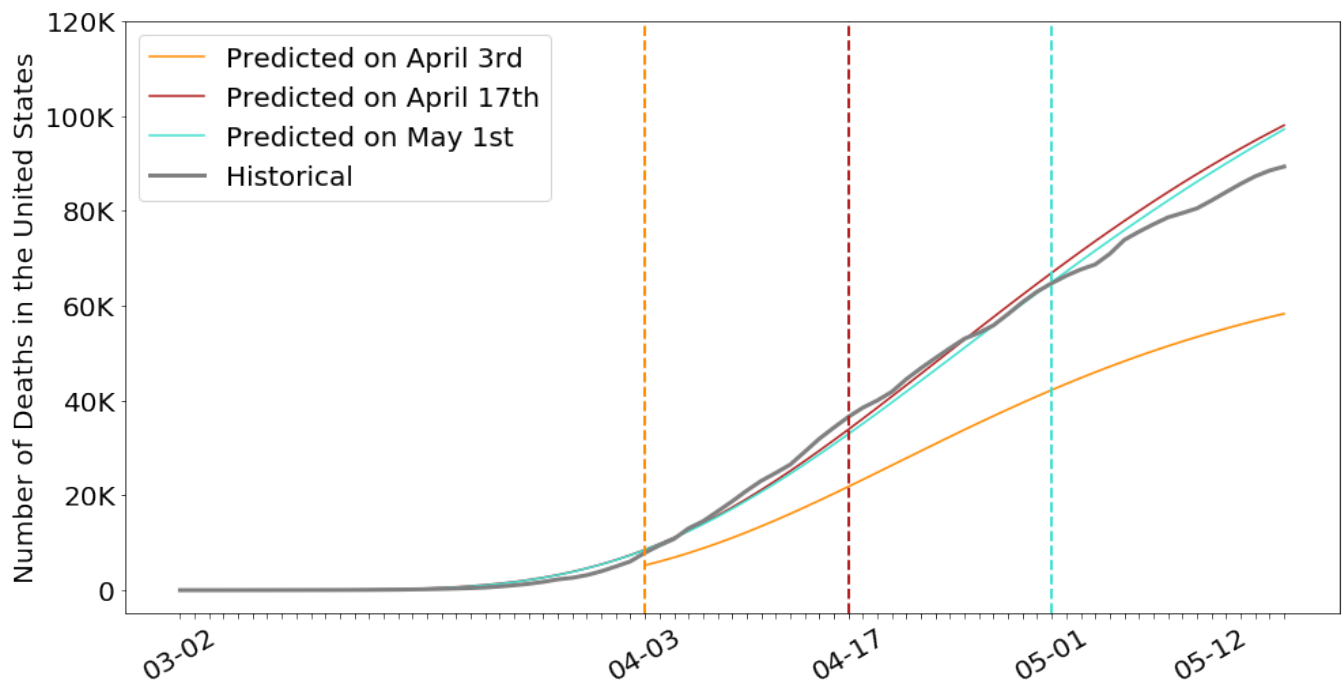

Fig. S4. Cumulative number of deaths in the United States according to our projections made at different points in time, against actual observations

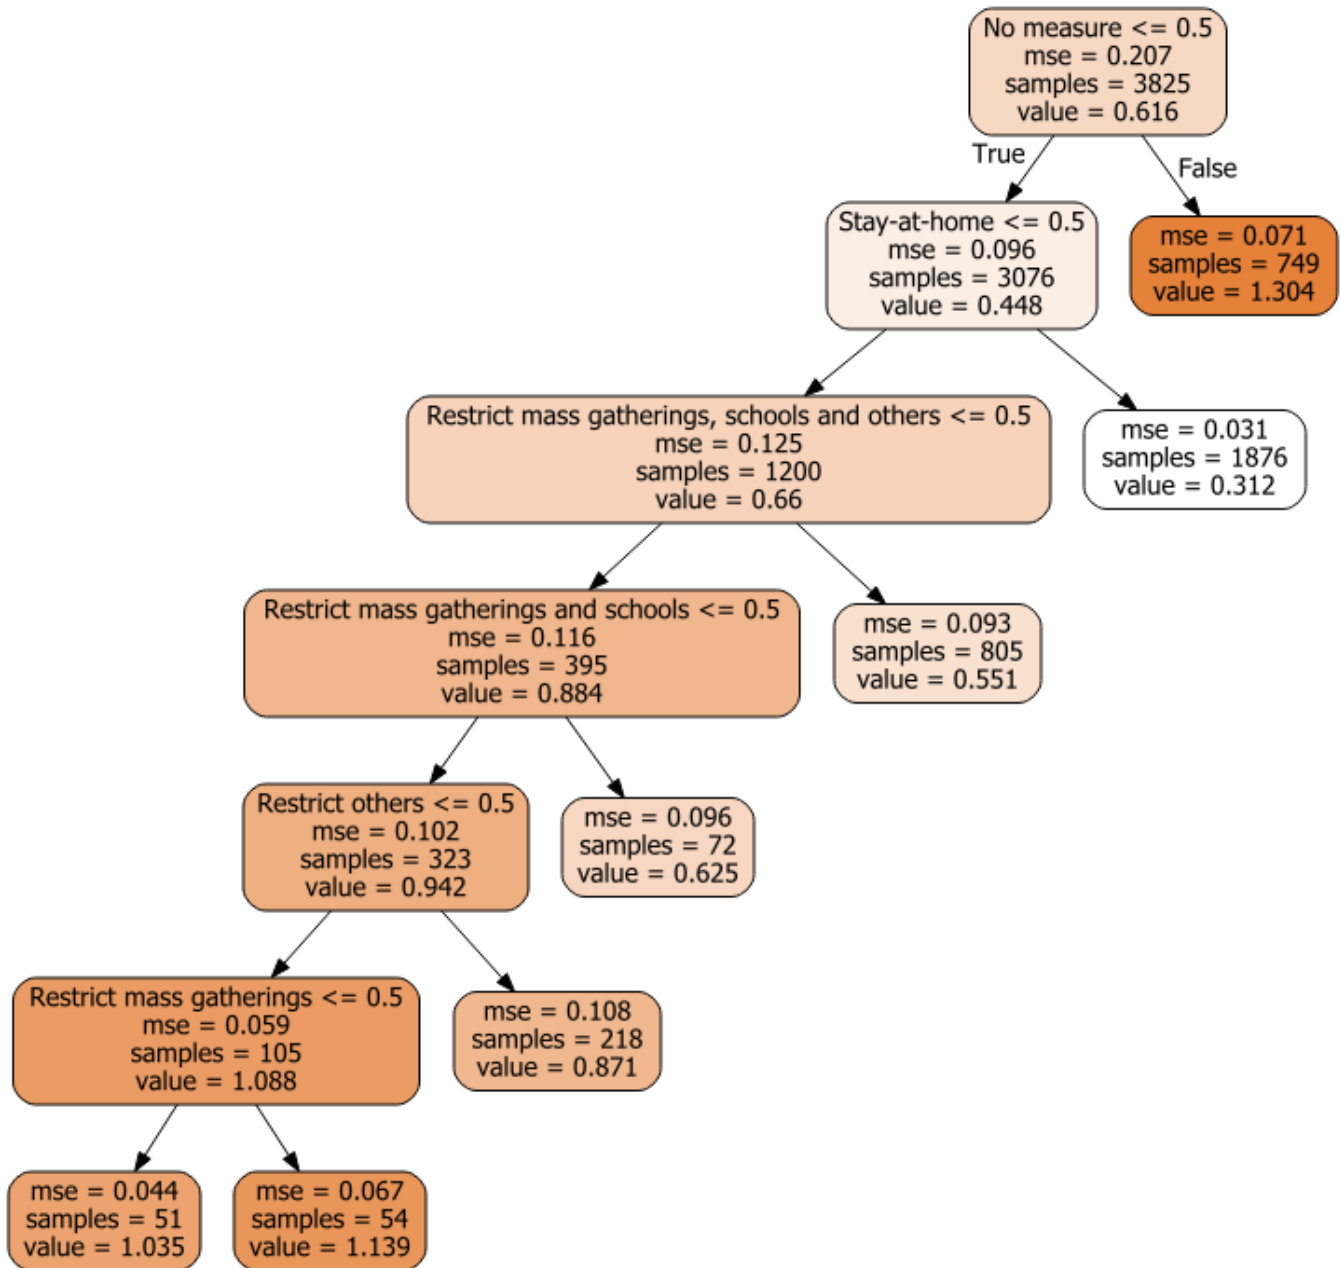

Fig. S5. Regression Tree (CART) predicting an average value of  $\gamma(t)$  for each policy.

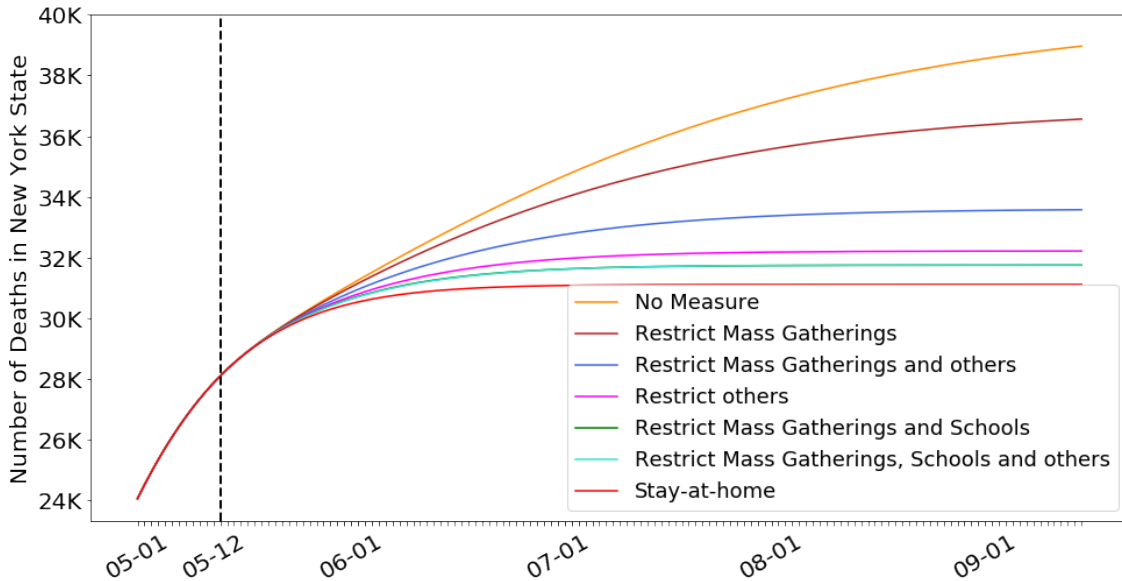

(a) Impact of different policies on the future number of deaths, in NY

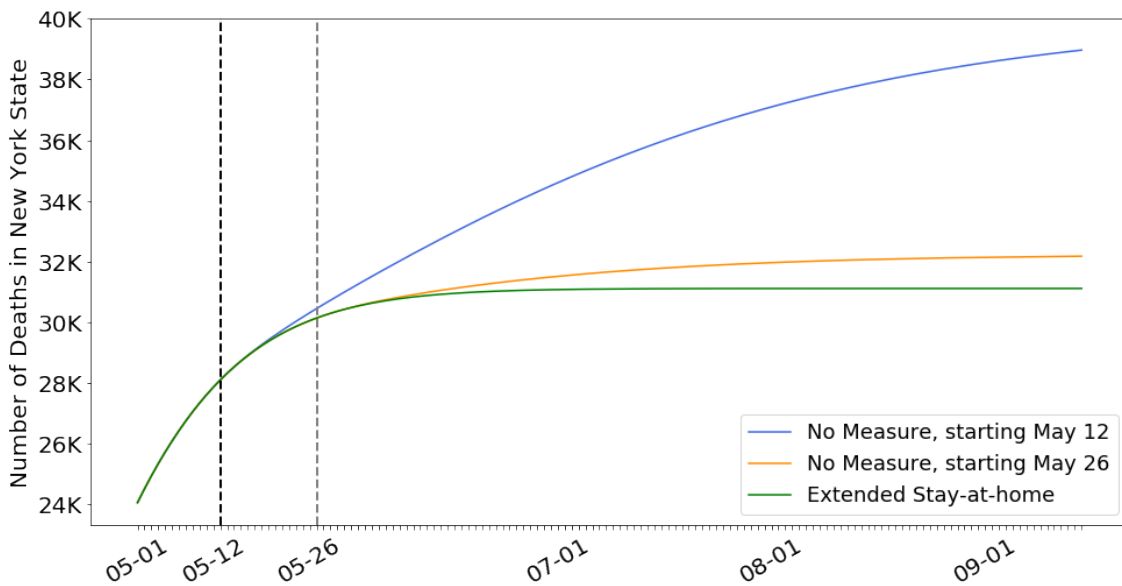

(b) Impact of the timing of policies on the future number of deaths, in NY.

Fig. S6. Impact of different policies on the future number of deaths in the State of New York, for different policies and policy start dates.

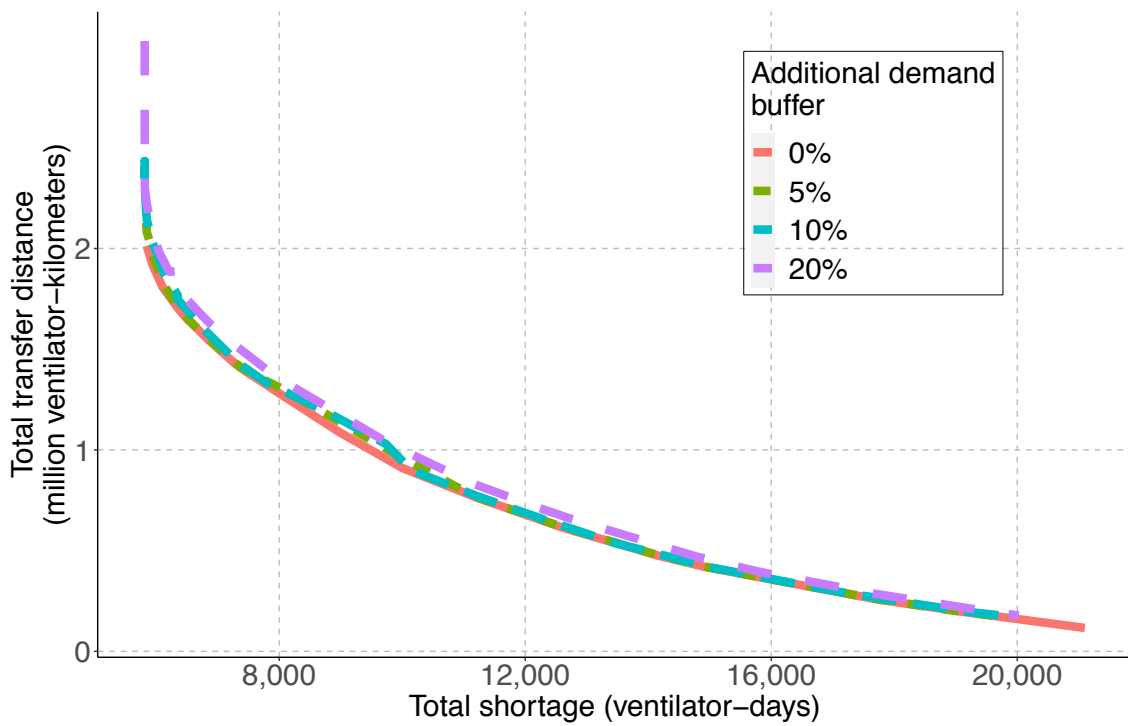

(a) Impact of additional buffer

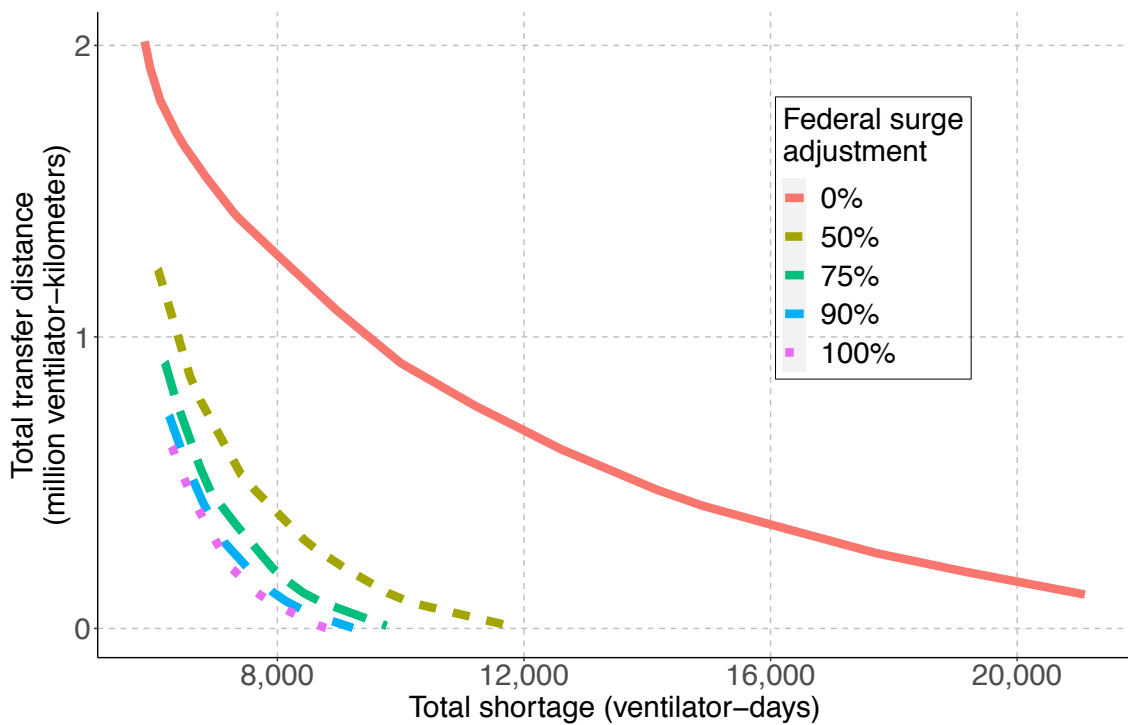

(b) Impact of federal surge

Fig. S7. Influence of additional buffer and federal surge availability on ventilator shortage and ventilator transfers.

**Table S1. Comorbidities, demographics, average lab values, average length of stay and projected mortality among COVID-19 patients, in aggregate and broken down into mild/severe patients.**

| Feature                               | All Patients |       | Mild Patients |       | Severe Patients |       |
|---------------------------------------|--------------|-------|---------------|-------|-----------------|-------|
|                                       | No. Report   | Avg.  | No. Report.   | Avg.  | No. Report.     | Avg.  |
| <b>Demographics</b>                   |              |       |               |       |                 |       |
| Male (%)                              | 131,200      | 53.0% | 9,570         | 48.8% | 10,120          | 68.7% |
| Age (years)                           | 119,000      | 51.3  | 8,022         | 46.1  | 9,685           | 68.2  |
| White/European (%)                    | 55,490       | 22.2% | 10,120        | 9.7%  | 9,887           | 63.9% |
| African American (%)                  | 55,490       | 5.4%  | 10,120        | 3.5%  | 9,887           | 2.5%  |
| Asian (%)                             | 55,320       | 51.3% | 10,300        | 80.2% | 9,933           | 31.2% |
| Hispanic/Latino                       | 50,630       | 19.9% | 8,017         | 0%    | 9,107           | 0%    |
| Multiple ethnicities/other            | 55,190       | 3.6%  | 10,120        | 6.9%  | 9,887           | 2.7%  |
| <b>Comorbidities</b>                  |              |       |               |       |                 |       |
| Smoking history                       | 27,900       | 16.1% | 6,080         | 12.2% | 1,973           | 16.6% |
| Hypertension                          | 38,390       | 35.9% | 8,252         | 15.2% | 8,449           | 54.4% |
| Diabetes                              | 39,790       | 20.8% | 8,396         | 6.8%  | 8,818           | 26.1% |
| Cardio Disease                        | 40,030       | 12.4% | 8,028         | 3.0%  | 9,540           | 20.3% |
| COPD                                  | 34,150       | 6.0%  | 6,297         | 2.8%  | 8,727           | 10.0% |
| Cancer                                | 29,170       | 7.2%  | 6,259         | 3.2%  | 8,355           | 12.9% |
| Liver Disease                         | 18,300       | 2.8%  | 1,875         | 2.3%  | 6,832           | 3.5%  |
| Cerebrovascular                       | 6,830        | 9.8%  | 3,245         | 2.7%  | 1,360           | 24.8% |
| Kidney Disease                        | 35,500       | 5.7%  | 6,152         | 1.2%  | 8,139           | 10.8% |
| <b>Lab values</b>                     |              |       |               |       |                 |       |
| WBC Count (10 <sup>9</sup> /L)        | 19,970       | 6.41  | 5,403         | 5.07  | 2,305           | 6.80  |
| Neutrophil Count (10 <sup>9</sup> /L) | 12,500       | 4.72  | 2,236         | 5.12  | 1,410           | 5.78  |
| Platelet Count (10 <sup>9</sup> /L)   | 12,125       | 195.7 | 5,165         | 184.0 | 2,105           | 170.4 |
| ALT (U/L)                             | 14,467       | 29.0  | 2,840         | 24.6  | 2,428           | 31.1  |
| AST (U/L)                             | 14,214       | 37.3  | 2,766         | 27.1  | 2,366           | 45.7  |
| BUN (mmol/L)                          | 4,822        | 5.22  | 1,700         | 4.18  | 1,138           | 6.86  |
| Creatinine (μmol/L)                   | 8,504        | 63.08 | 2,529         | 66.0  | 2,454           | 56.4  |
| CRP Count (mg/L)                      | 17,090       | 76.5  | 2,573         | 18.9  | 2,339           | 94.1  |
| Interleukin-6 (pg/mL)                 | 2,582        | 24.57 | 1,127         | 4.17  | 552             | 38.63 |
| Procalcitonin (ng/mL)                 | 14,750       | 2.26  | 1,468         | 1.85  | 1,969           | 4.81  |
| D-Dimer (mg/L)                        | 13,330       | 38.81 | 2,478         | 8.04  | 2,401           | 165.9 |
| Length of Stay (days)                 | 16,010       | 10.7  | 4,131         | 14.0  | 5,642           | 7.97  |
| Proj. Mortality (%)                   | 111,700      | 11.7% | 7,428         | 0.4%  | 9,146           | 74.0% |



**Table S2. Count and prevalence of treatments among COVID-19 patients, broken down per continent (Asia, Europe, North America). A “-” indicates that fewer than 100 patients in a subpopulation reported on this symptom.**

| Treatment            | Asia       |           | Europe      |           | North America |           |
|----------------------|------------|-----------|-------------|-----------|---------------|-----------|
|                      | No. Report | Prev. (%) | No. Report. | Prev. (%) | No. Report.   | Prev. (%) |
| Kaletra              | 5,665      | 35.2%     | –           | –         | –             | –         |
| Oseltamivir          | 5,901      | 25.1%     | –           | –         | –             | –         |
| Remdesivir           | 337        | 47.4%     | –           | –         | 868           | 10.3%     |
| Arbidol              | 5,902      | 34.8%     | –           | –         | –             | –         |
| Interferon           | 3,647      | 51.8%     | –           | –         | –             | –         |
| Hydroxychloroquine   | 6,008      | 0.7%      | –           | –         | 1,235         | 61.7%     |
| Invasive Ventilation | 7,945      | 8.0%      | 75,120      | 4.8%      | 5,840         | 19.3%     |
| Proj. Mortality      | 12,820     | 16.7%     | 79,750      | 9.9%      | 19,060        | 15.8%     |

**Table S3. Characteristics of study population for mortality prediction model.**

|                            | All ( <i>N</i> = 2, 831) | Survivors ( <i>N</i> = 2, 120) | Non-Survivors ( <i>N</i> = 711) | P-Value   |
|----------------------------|--------------------------|--------------------------------|---------------------------------|-----------|
| Age                        | 68.0 (57.0-79.0)         | 63.0 (54.0-74.0)               | 81.0 (73.2-86.0)                | 1.28E-185 |
| Female *                   | 1095.0 (38.7%)           | 868.0 (40.9%)                  | 227.0 (31.9%)                   | 1.18E-05  |
| Heart Rate                 | 89.0 (79.0-101.0)        | 90.0 (80.0-102.0)              | 87.0 (78.0-100.0)               | 1.29E-03  |
| Oxygen Saturation          | 94.0 (90.0-96.0)         | 94.4 (92.0-96.0)               | 88.5 (80.0-93.6)                | 3.16E-37  |
| Temperature (F)            | 98.4 (97.5-99.7)         | 98.4 (97.5-99.6)               | 98.8 (97.7-100.0)               | 2.42E-04  |
| Alanine Aminotransferase   | 27.0 (17.0-44.0)         | 27.8 (17.5-45.0)               | 25.5 (16.0-41.0)                | 3.77E-02  |
| Aspartate Aminotransferase | 36.0 (25.0-55.0)         | 34.0 (24.4-51.0)               | 45.0 (30.0-69.0)                | 1.55E-11  |
| Blood Glucose              | 118.0 (105.0-141.0)      | 115.0 (103.4-133.0)            | 134.0 (113.0-171.0)             | 1.12E-22  |
| Blood Urea Nitrogen        | 17.0 (12.6-25.2)         | 15.0 (11.5-20.0)               | 29.5 (20.3-47.2)                | 1.02E-65  |
| C-Reactive Protein         | 74.2 (29.1-149.5)        | 58.6 (22.7-119.3)              | 141.1 (72.0-223.1)              | 4.76E-50  |
| Creatinine                 | 1.0 (0.8-1.2)            | 0.9 (0.7-1.1)                  | 1.3 (1.0-1.8)                   | 2.84E-36  |
| Hemoglobin                 | 13.9 (12.7-15.0)         | 14.0 (12.9-15.0)               | 13.5 (12.0-14.7)                | 9.11E-10  |
| Mean Corpuscular Volume    | 87.8 (84.9-91.0)         | 87.5 (84.7-90.4)               | 89.3 (85.8-92.7)                | 2.80E-08  |
| Platelets                  | 201.0 (156.0-263.0)      | 206.0 (160.0-266.5)            | 185.0 (141.0-246.8)             | 6.62E-08  |
| Potassium                  | 4.1 (3.7-4.4)            | 4.0 (3.7-4.4)                  | 4.1 (3.7-4.6)                   | 1.43E-04  |
| Prothrombin Time (INR)     | 1.1 (1.0-1.2)            | 1.1 (1.0-1.2)                  | 1.1 (1.0-1.3)                   | 3.20E-05  |
| Sodium                     | 137.1 (135.0-140.0)      | 137.0 (135.0-139.4)            | 138.0 (135.0-141.0)             | 5.65E-08  |
| White Blood Cell Count     | 6.8 (5.2-9.2)            | 6.5 (5.0-8.7)                  | 8.0 (5.7-11.4)                  | 3.00E-15  |
| Cardiac dysrhythmias *     | 200.0 (7.1%)             | 127.0 (6.0%)                   | 73.0 (10.3%)                    | 6.50E-04  |
| Chronic kidney disease *   | 65.0 (2.3%)              | 33.0 (1.6%)                    | 32.0 (4.5%)                     | 3.67E-04  |
| Heart disease *            | 125.0 (4.4%)             | 80.0 (3.8%)                    | 45.0 (6.3%)                     | 1.10E-02  |
| Diabetes *                 | 345.0 (12.2%)            | 234.0 (11.0%)                  | 111.0 (15.6%)                   | 2.73E-03  |
| Mortality *                | 711 (25.1%)              | 0 (0%)                         | 711 (100%)                      | -         |

\* Count (proportion) is reported for binary variables.

**Table S4. Characteristics of study population for infection test prediction model.**

|                             | All ( <i>N</i> = 3, 135) | No Infection ( <i>N</i> = 1, 474) | Infection ( <i>N</i> = 1, 661) | P-Value  |
|-----------------------------|--------------------------|-----------------------------------|--------------------------------|----------|
| Age                         | 63.0 (49.0-78.0)         | 58.0 (42.0-78.0)                  | 66.0 (55.0-78.5)               | 9.00E-28 |
| Female *                    | 1444.0 (46.1%)           | 777.0 (52.7%)                     | 667.0 (40.2%)                  | 1.70E-12 |
| Heart Rate                  | 88.5 (78.0-100.5)        | 89.0 (78.0-101.2)                 | 88.0 (78.2-100.0)              | 6.13E-01 |
| Oxygen Saturation           | 95.4 (91.8-97.0)         | 96.5 (94.8-97.5)                  | 94.2 (89.6-96.4)               | 1.68E-31 |
| Respiratory Frequency       | 18.0 (16.0-19.0)         | 18.0 (16.0-18.0)                  | 18.0 (16.0-20.0)               | 9.64E-21 |
| Temperature                 | 98.3 (97.5-99.5)         | 97.7 (97.2-98.7)                  | 99.0 (97.9-100.0)              | 4.51E-80 |
| Alanine Aminotransferase    | 22.0 (15.0-37.0)         | 19.0 (13.0-30.0)                  | 27.0 (18.0-43.0)               | 6.59E-09 |
| Aspartate Aminotransferase  | 29.0 (21.0-47.0)         | 23.0 (19.0-31.0)                  | 37.0 (26.0-57.0)               | 1.20E-20 |
| Blood Urea Nitrogen         | 17.0 (13.0-25.0)         | 16.0 (12.0-22.0)                  | 18.0 (13.0-27.0)               | 3.78E-05 |
| Calcium                     | 9.3 (8.9-9.7)            | 9.6 (9.2-9.9)                     | 9.0 (8.7-9.4)                  | 1.90E-96 |
| C-Reactive Protein          | 31.0 (3.4-107.6)         | 4.7 (1.1-35.4)                    | 69.8 (23.2-152.3)              | 1.28E-83 |
| Creatinine                  | 0.9 (0.8-1.2)            | 0.9 (0.7-1.1)                     | 1.0 (0.8-1.2)                  | 2.19E-05 |
| Hemoglobin                  | 13.5 (12.3-14.7)         | 13.4 (12.1-14.6)                  | 13.6 (12.5-14.8)               | 5.70E-05 |
| Mean Corpuscular Volume     | 87.2 (84.0-90.3)         | 87.7 (84.2-90.7)                  | 86.8 (83.9-90.0)               | 1.43E-01 |
| Platelets                   | 223.0 (174.0-285.0)      | 241.0 (198.0-297.0)               | 202.0 (156.0-266.0)            | 1.41E-18 |
| Red Cell Distribution Width | 13.2 (12.5-14.3)         | 13.2 (12.5-14.5)                  | 13.1 (12.4-14.0)               | 1.59E-06 |
| Sodium                      | 139.0 (137.0-141.0)      | 140.0 (138.0-142.0)               | 139.0 (136.0-141.0)            | 1.12E-14 |
| Prothrombin Time (INR)      | 1.0 (1.0-1.1)            | 1.1 (1.0-1.1)                     | 1.0 (1.0-1.1)                  | 8.96E-01 |
| Total Bilirubin             | 0.6 (0.5-0.8)            | 0.6 (0.4-0.9)                     | 0.6 (0.5-0.8)                  | 8.83E-03 |
| White Blood Cell Count      | 7.6 (5.8-10.1)           | 8.7 (7.0-11.1)                    | 6.6 (5.1-8.7)                  | 7.59E-38 |
| COVID-19 Positive Test *    | 1661 (53.0%)             | 0 (0%)                            | 1661 (100%)                    | -        |

\* Count (proportion) is reported for binary variables.

**Table S5. Performance evaluation summary. Average results across 40 random seeds are reported along with 95% confidence intervals. A minimum threshold of 90% sensitivity is enforced.**

| Model Type       | Lab Values | Threshold     | Accuracy      | Sensitivity   | Specificity   | Precision     | Negative predictive value | False positive rate |
|------------------|------------|---------------|---------------|---------------|---------------|---------------|---------------------------|---------------------|
| <b>Mortality</b> | Present    | 17.45         | 79.29         | 90.38         | 75.66         | 55.86         | 95.97                     | 24.34               |
|                  |            | (15.61,19.29) | (77.47,81.11) | (90.38,90.38) | (73.25,78.07) | (53.46,58.25) | (95.84,96.1)              | (21.93,26.75)       |
| <b>Mortality</b> | Absent     | 12.66         | 70.85         | 90.38         | 64.53         | 46.15         | 95.3                      | 35.47               |
|                  |            | (11.11,14.2)  | (68.45,73.24) | (90.38,90.38) | (61.37,67.7)  | (43.96,48.33) | (95.04,95.55)             | (32.3,38.63)        |
| <b>Infection</b> | Present    | 28.32         | 77.58         | 90.36         | 63.24         | 73.59         | 85.26                     | 36.76               |
|                  |            | (26.63,30.02) | (76.48,78.68) | (90.36,90.36) | (60.9,65.58)  | (72.33,74.85) | (84.79,85.73)             | (34.42,39.1)        |
| <b>Infection</b> | Absent     | 27.51         | 66.31         | 90.36         | 39.32         | 62.64         | 78.12                     | 60.68               |
|                  |            | (26.55,28.47) | (65.37,67.25) | (90.36,90.36) | (37.33,41.32) | (61.85,63.44) | (77.28,78.96)             | (58.68,62.67)       |

**Table S6. Values of normalized offset computations to correct the estimation of  $\gamma(t)$ . Policies include: (i) *No measure* (“none”); (ii) *Restrict mass gatherings* (“R-MG”); (iii) *Restrict others* (“R-O”); (iv) *Authorize schools, restrict mass gatherings and others* (“R-MG-O”); (v) *Restrict mass gatherings and schools* (“R-MG-S”); (vi) *Restrict mass gatherings, schools and others* (“R-MG-S-O”); and (vii) *Stay-at-home* (“SAH”).**

| from/to  | none   | R-MG   | R-O    | R-MG-O | R-MG-S | R-MG-S-O | SAH    |
|----------|--------|--------|--------|--------|--------|----------|--------|
| none     | 0      | -0.127 | -0.332 | -0.206 | -0.521 | -0.577   | -0.761 |
| R-MG     | +0.127 | 0      | -0.206 | -0.080 | -0.294 | -0.451   | -0.634 |
| R-O      | +0.332 | +0.206 | 0      | +0.126 | -0.189 | -0.245   | -0.429 |
| R-MG-O   | +0.206 | +0.080 | -0.126 | 0      | -0.314 | -0.371   | -0.554 |
| R-MG-S   | +0.521 | +0.294 | +0.189 | +0.314 | 0      | -0.057   | -0.240 |
| R-MG-S-O | +0.577 | +0.451 | +0.245 | +0.371 | +0.057 | 0        | -0.183 |
| SAH      | +0.761 | +0.634 | +0.429 | +0.554 | +0.240 | +0.183   | 0      |

259 **Bibliography**

- 260 1. O Troyanskaya, et al., Missing value estimation methods for dna microarrays. *Bioinformatics* **17**, 520–525 (2001).
- 261 2. T Chen, C Guestrin, XGBoost: A scalable tree boosting system in *Proceedings of the 22nd ACM SIGKDD International Conference on*
- 262 *Knowledge Discovery and Data Mining*, KDD '16. (ACM, New York, NY, USA), pp. 785–794 (2016).
- 263 3. F Pedregosa, et al., Scikit-learn: Machine learning in Python. *J. machine Learn. research* **12**, 2825–2830 (2011).
- 264 4. T Head, et al., Scikit-optimize (scikit-optimize/scikit-optimize: v0.5.2) (2017).
- 265 5. RH Byrd, JC Gilbert, J Nocedal, A trust region method based on interior point techniques for nonlinear programming. *Math. programming*
- 266 **89**, 149–185 (2000).
- 267 6. JC Lagarias, JA Reeds, MH Wright, PE Wright, Convergence properties of the nelder–mead simplex method in low dimensions. *SIAM J.*
- 268 *on optimization* **9**, 112–147 (1998).
- 269 7. S Mehrotra, H Rahimian, M Barah, F Luo, K Schantz, A model of supply-chain decisions for resource sharing with an application to
- 270 ventilator allocation to combat COVID-19. *Nav. Res. Logist. (NRL)* (2020).
- 271 8. L Rubinson, et al., Mechanical ventilators in us acute care hospitals. *Disaster medicine public health preparedness* **4**, 199–206 (2010).
- 272 9. NA Halpern, KS Tan, VT SCCM, Us icu resource availability for covid-19. *Soc. Critical Care Medicine*, March **25** (2020).
- 273 10. New York Times, A Ventilator Stockpile, With One Hitch: Thousands Do Not Work
- 274 (<https://www.nytimes.com/2020/04/01/us/politics/coronavirus-ventilators.html>) (2020).
- 275 11. New York Times, The U.S. Tried to Build a New Fleet of Ventilators. The Mission Failed.
- 276 (<https://www.nytimes.com/2020/03/29/business/coronavirus-us-ventilator-shortage.html>) (2020).
